## **The conserved ER-transmembrane protein TMEM39 coordinates with COPII to promote collagen secretion and prevent ER stress**

Short title: The TMEM39A protein family is essential for collagen secretion

Zhe Zhang<sup>1, \*</sup>, Shuo Luo<sup>1</sup>, Guilherme Oliveira Barbosa<sup>1</sup>, Meirong Bai<sup>1</sup>, Thomas B. Kornberg<sup>1,2</sup> and Dengke K. Ma<sup>1, 3, 4, \*</sup>

<sup>1</sup>Cardiovascular Research Institute, University of California San Francisco, San Francisco, CA 94158

<sup>2</sup>Department of Biochemistry and Biophysics, University of California San Francisco, San Francisco, CA 94158

<sup>3</sup>Department of Physiology, University of California San Francisco, San Francisco, CA 94158

<sup>4</sup>Innovative Genomics Institute, 2151 Berkeley Way, Berkeley, CA 94704

\*Correspondence: [Zhe.Zhang@ucsf.edu](mailto:Zhe.Zhang@ucsf.edu) (Z. Zhang), [Dengke.Ma@ucsf.edu](mailto:Dengke.Ma@ucsf.edu) (D. K. Ma)

1

2

3 **Abstract**

4 Dysregulation of collagen production and secretion contributes to aging and tissue  
5 fibrosis of major organs. How premature collagen proteins in the endoplasmic  
6 reticulum (ER) route as specialized cargos for secretion remains to be fully elucidated.

7 Here, we report that TMEM39, an ER-localized transmembrane protein, regulates  
8 production and secretory cargo trafficking of procollagen. We identify the *C. elegans*  
9 ortholog TMEM-39 from an unbiased RNAi screen and show that deficiency of *tmem-*  
10 *39* leads to striking defects in cuticle collagen production and constitutively high ER  
11 stress response. RNAi knockdown of the *tmem-39* ortholog in *Drosophila* causes  
12 similar defects in collagen secretion from fat body cells. The cytosolic domain of human  
13 TMEM39A binds to Sec23A, a vesicle coat protein that drives collagen secretion and  
14 vesicular trafficking. TMEM-39 regulation of collagen secretion is independent of ER  
15 stress response and autophagy. We propose that roles of TMEM-39 in collagen  
16 secretion and preventing ER stress are likely evolutionarily conserved.

17

18 **Keywords**

19 TMEM-39, Sec23A, Collagen, Fibrosis, COPII vesicles

## 20 **Introduction**

21 Collagen is the major molecular component of connective tissues, and the most  
22 abundant protein in animals (1). Collagen dysregulation causes many human disorders,  
23 including autoimmune diseases, brittle bone diseases (too little collagen), tissue  
24 fibrosis (too much collagen) and aging-related disorders (2-7). The multi-step  
25 biosynthesis of mature collagen by the cell is a complex process and involves  
26 procollagen gene transcription and protein translation, posttranslational modification,  
27 assembly into procollagen trimers inside the endoplasmic reticulum (ER), vesicular  
28 secretion from ER, extracellular peptide cleavage and cross-linking into collagen fibers  
29 (1, 8).

30 Specific mechanisms underlying the secretion of procollagen still remain poorly  
31 understood. In general, specialized intracellular vesicles defined by the coat protein  
32 complex II (COPII) transport most secreted proteins, including procollagen, from the  
33 ER to the Golgi apparatus (9, 10). Sec23, Sec24, Sec13 and Sec31 comprise COPII  
34 coat proteins, while the transport protein particle (TRAPP) complex acts a key tethering  
35 factor for COPII vesicles en route to the Golgi (11-13). Typical COPII vesicles are 60  
36 to 80 nm in diameter, which is not sufficient for transporting procollagen trimers with  
37 up to 300 to 400 nm in length (14). In mammals, large-size COPII-coated vesicles may  
38 transport procollagen from the ER to the Golgi apparatus. TANGO1, a transmembrane  
39 protein at the ER exit site, mediates formation of specialized collagen-transporting  
40 vesicle and recruitment of procollagen (14-16). The N-terminal SH3-like domain of  
41 TANGO1 binds to the collagen chaperone HSP47 in the ER lumen, recruiting

42 procollagens to the ER exit site (17). Its C-terminal proline-rich domain (PRD) servers  
43 as a COPII receptor by interacting with the inner shell proteins Sec23/Sec24 (18). The  
44 coil-coil domain of TANGO1 forms a stable complex with cTAE5 and SEC12, which is  
45 particularly enriched around large COPII carriers for procollagen (19). Through its  
46 membrane helices, TANGO1 organizes ER exit sites by creating a lipid diffusion barrier  
47 and an export conduit for collagen (20). While requirement of TANGO1 for secretion  
48 may depend on specific collagen types, it remains unclear whether TANGO1's  
49 functions are broadly conserved in all animals (21, 22).

50 *Caenorhabditis elegans* produces over 180 collagen members that constitute the  
51 cuticle and basement membranes, encodes conserved homologs of COPII/TRAPP  
52 proteins, yet lacks apparent TANGO1 homologs (23-26). This indicates that  
53 evolutionarily conserved and TANGO1-independent mechanisms may exist in *C.*  
54 *elegans* to regulate procollagen secretion. From a genome-wide RNAi screen for  
55 genes affecting ER stress response, we previously identified *tmem-131* that defines a  
56 broadly conserved family of proteins important for procollagen assembly and secretion  
57 (22). Mutations in specific collagen genes, conserved COPII/TRAPP-encoding  
58 homologs, and impairment of collagen biosynthetic pathway components are known  
59 to result in a range of phenotypes including ER stress response, abnormal cuticle-  
60 associated morphology (Blister and Dumpy), and early death or growth arrest (23).  
61 *tmem-131* mutants exhibit such phenotypes typical for genes required for collagen  
62 secretion (22), while many other evolutionarily conserved genes of similar phenotype  
63 but unknown functions from our initial screen remain uncharacterized.

64 Here, we characterize another *C. elegans* gene *tmem-39* that encodes an ER  
65 transmembrane protein and is essential for cuticle collagen production. The deficiency  
66 of TMEM-39 protein in *C. elegans* impairs cuticle integrity and secretion of COL-19, an  
67 adult-specific cuticle collagen protein (27). We show that the *Drosophila* ortholog of  
68 *tmem-39*, *CG13016*, is also essential for collagen secretion. From yeast-two-hybrid  
69 (Y2H) screen, we find that the cytoplasmic loop domain of human TMEM39A binds to  
70 Sec23A, the inner-shell component of the COPII coating complex. We demonstrate  
71 that SEC-23 and other COPII proteins are also essential for collagen secretion in *C.*  
72 *elegans*. Our findings suggest that TMEM-39 coordinates with TMEM-131 and COPII  
73 transport machineries in the ER, and its roles in collagen secretion and preventing ER  
74 stress are likely evolutionarily conserved in multicellular animals.

## 75 **Results**

### 76 **Genome-wide RNAi screen identifies *tmem-39* regulating ER stress response in** 77 ***C. elegans***

78 We identified *D1007.5*, the sole *tmem-39* homolog in *C. elegans*, from a genome-wide  
79 RNAi screen for genes affecting the abundance of transgenic reporter *asp-17p::GFP*,  
80 which is up-regulated by temperature stress and down-regulated by ER stress (22).  
81 RNAi against *tmem-39* fully suppressed the *asp-17p::GFP* reporter expression (Fig  
82 1A). Ensembl gene tree analysis and amino acid sequence alignment show that  
83 TMEM39 family proteins are broadly evolutionarily conserved from *C. elegans* to  
84 humans (Figs 1B and S1). A recent study reported that TMEM39A is an ER-localized  
85 transmembrane protein that regulates autophagy by controlling the trafficking of the

86 PtdIns(4)P Phosphatase SAC1 from the ER (28). How TMEM-39 regulates ER stress  
87 response in *C. elegans* remains unknown.

88 **Fig 1. TMEM-39 regulates ER stress response in *C. elegans*.**

89 (A) Exemplar fluorescence images for *asp-17p::GFP* with control and *tmem-39* RNAi.  
90 Scale bars: 20  $\mu$ m. (B) Ensembl gene tree analysis for TMEM39 protein family and  
91 amino acid sequence alignment among metazoan species (adapted from  
92 <https://m.ensembl.org/>). (C-D) Exemplar fluorescence and bright-field images for the  
93 UPR reporter *hsp-4p::GFP* with control and *tmem-39* RNAi in wild type (C) and *ire-1*(D)  
94 mutants. Scale bars: 20  $\mu$ m. (E) Schematic of *tmem-39* gene structure with the *dma258*  
95 deletion generated by CRISPR-Cas9. Bold and underlined are sgRNA target sequence  
96 from the *tmem-39* regions. The location of the deleted *tmem-39* is marked with “^”. (F)  
97 qRT-PCR measurements of *hsp-4p::GFP* mRNA levels in wild-type and *dma258*  
98 mutants. \*\*\*P < 0.001 (n  $\geq$  3 biological replicates).

99 In this work, we first confirmed that RNAi against *tmem-39* in *C. elegans* caused a fully  
100 penetrant and strong up-regulation of *hsp-4p::GFP* in the hypoderm (Fig 1C). *hsp-*  
101 *4p::GFP* is a well-established reporter for unfolded protein response (UPR) caused by  
102 ER stress in *C. elegans* (29). Loss-of-function of IRE-1, an ER stress-sensing protein,  
103 abolished *hsp-4p::GFP* induction in *tmem-39* RNAi treated animals (Fig 1D). To verify  
104 the *tmem-39* RNAi phenotype, we used CRISPR/Cas9 to generate a *C. elegans* null  
105 allele *dma258* carrying a 2750 bp deletion of the entire coding sequence (Fig 1E and  
106 Tables S1-2). *dma258* mutants exhibited an abnormally elevated level of *hsp-4p::GFP*  
107 (Fig 1F). Besides constitutively activated *hsp-4p::GFP* transcription, TMEM-39  
108 deficient animals by RNAi or *dma258* were small and dumpy. Together, these results  
109 suggest that TMEM-39 as an ER-localized transmembrane protein is required for  
110 maintaining normal homeostasis of ER-resident proteins.

111 **Loss of *tmem-39* impairs cuticle collagen secretion in *C. elegans***

112 To identify potential protein clients in the ER regulated by TMEM-39, we examined 24

113 various translational reporters of ER-resident secreted and transmembrane proteins  
114 (S2 Fig and S3 Table) and found that *tmem-39* RNAi knock-down strongly reduced  
115 abundance of the COL-19::GFP reporter (Fig 2A). COL-19 is a *C. elegans* exoskeleton  
116 collagen that is secreted by the underlying hypoderm and required for integral structure  
117 of the cuticle (23). The C-terminal GFP-tagged COL-19 reporter enables highly robust  
118 and tractable visualization of the cuticle morphology and to identify defects in the  
119 collagen production machinery (27).

120 **Fig 2. TMEM-39 is essential for collagen secretion and cuticle formation in *C.***  
121 ***elegans*.**

122 (A) Exemplar epifluorescence image of *col-19::GFP* with control and *tmem-39* RNAi.  
123 Three to four animals were shown to indicate representative reporter expression with  
124 around 50 animals observed. (B) Exemplar confocal fluorescence images of COL-  
125 19::GFP with indicated phenotypic penetrance of control RNAi and *tmem-39* RNAi in  
126 wild-type animals. Scale bars: 20  $\mu\text{m}$ . (C) Exemplar Western blot analysis of COL-  
127 19::GFP proteins from total lysates of wild type animals with control and *tmem-39* RNAi.  
128 IB, immunoblotting. The arrow indicates soluble premature monomers; triangles  
129 indicate insoluble mature monomers and cross-linked COL-19::GFP. (D) Exemplar  
130 fluorescence images of *col-19* transcriptional reporter (*col-19* promoter-driven GFP)  
131 with indicated phenotypic penetrance of control RNAi and *tmem-39* RNAi in wild-type  
132 animals, indicating no significant difference in GFP expression. Scale bars: 20  $\mu\text{m}$ . (E)  
133 qRT-PCR quantification of endogenous *col-19* mRNA levels in wild-type and *dma258*  
134 mutants. \*\*\*P < 0.001 (n  $\geq$  3 biological replicates). (F) Exemplar confocal fluorescence  
135 images of COL-19::GFP with indicated phenotypic penetrance in wild-type and *tmem-*  
136 *39* mutant animals. (G-H) Exemplar images of COL-101::GFP of control RNAi and  
137 *tmem-39* RNAi in wild-type animals for Western blot analysis (G) and confocal  
138 fluorescence images (H), Scale bars: 20  $\mu\text{m}$ . (I) Electron microscopy of adult *C.*  
139 *elegans* cross sections in wild type and *tmem-39* mutants. C, cuticle. Scale bar: 2  $\mu\text{m}$ .

140 Using confocal microscopy to characterize the structure of hypodermal cuticle, we  
141 found that in control RNAi animals, COL-19::GFP is enriched in the hypoderm,  
142 constituting regular annular furrows and lateral alae of the cuticle (Fig 2B). In the *tmem-*  
143 *39* RNAi animals, COL-19::GFP appeared to be clustered in the intracellular region of  
144 hypoderm, and largely absent in the cuticle (Fig 2B). We further analyzed the

145 abundance and composition of COL-19::GFP proteins by Western blot. Besides strong  
146 reduction of overall COL-19::GFP abundance, *tmem-39* RNAi markedly increased the  
147 soluble “premature” monomeric procollagens, while decreased the insoluble fraction  
148 of cross-linked multimers and “mature” monomers of COL-19::GFP (Fig 2C).

149 To examine possible involvement of *tmem-39* in collagen gene transcription, we used  
150 RNAi to knock-down *tmem-39* in animals with the *col-19p*::GFP transcriptional reporter  
151 in which *GFP* expression is driven by the promoter of *col-19*. In contrast to the striking  
152 decrease of overall COL-19::GFP protein abundance, the transcriptional activity of the  
153 *col-19* promoter was not affected by *tmem-39* (Figs 2B and 2D). We also evaluated  
154 the mRNA level of *col-19* by quantitative reverse transcription polymerase chain  
155 reaction (qRT-PCR) and found that the *dma258* mutant displayed a mild increase of  
156 *col-19* mRNA level, likely caused by compensatory feedback regulation of collagen  
157 gene transcription (Fig 2E). The *dma258* mutant fully recapitulated the *tmem-39* RNAi  
158 phenotype in defective COL-19::GFP secretion (Fig 2F).

159 There are two main collagen-enriched tissues in *C. elegans*, the cuticle (exoskeleton)  
160 and basement membranes (25). *tmem-39* RNAi had no effect on the production of  
161 mCherry-tagged EMB-9 (30), a Collagen IV  $\alpha$ 1 on basement membranes (S2T Fig and  
162 S3 Table). We found that loss of *tmem-39* specifically affected collagens in cuticle, as  
163 exemplified by LON-3::GFP and COL-101::GFP (Figs 2G-H and S3). Furthermore,  
164 electron microscopy (EM) analysis revealed striking reduction of cuticle thickness in  
165 *dma258* mutants than in wild type (Fig 2I). We also noticed that TMEM-39 deficient  
166 animals were small in size and dumpy, more sensitive to cuticle-disrupting osmotic



167 stresses and developed more slowly. Taken together, these results demonstrate  
168 essential roles of TMEM-39 in collagen secretion, proper cuticle formation and  
169 preventing ER stress likely induced by premature collagen accumulation in *C. elegans*.

### 170 **Evolutionarily conserved roles of TMEM39 family proteins for collagen secretion**

171 TMEM39 family proteins are evolutionarily conserved among multicellular animals, and  
172 the invertebrate model organisms *C. elegans* and *Drosophila* have one ortholog each,  
173 named *D1007.5* and *CG13016*, respectively (Fig 1B). We determined whether the  
174 function of TMEM39 family proteins in collagen secretion is evolutionarily conserved in  
175 *Drosophila*. We visualized collagen secretion in fat body cells of the *Lsp2> Col4a1::RFP*  
176 transgenic fly (31, 32), and generated transgenic RNAi to knock-down *Drosophila*  
177 *CG13016*, the sole *TMEM39* ortholog (Fig 3A). The physiological function of  
178 *Drosophila* fat body cells is to secrete collagen to the insect blood, hemolymph.  
179 Confocal microscopy analysis of COL4A1::RFP revealed that the Collagen type IV  
180 alpha 1::RFP proteins were strikingly accumulated in fat body cells of *CG13016* knock-  
181 down flies but not in control (Fig 3B). Such intracellular procollagen accumulation  
182 caused by *CG13016* RNAi indicates that the role of TMEM39 family proteins in  
183 collagen secretion is evolutionarily conserved also in *Drosophila*.

### 184 **Fig 3. Evolutionarily conserved roles of TMEM39 family proteins for collagen** 185 **secretion in *Drosophila*.**

186 (A) Schematic of generating fat body cell specific *CG13016* knock-down strains in  
187 *Drosophila*. *Lsp2-Gal4* specifically expresses in the fat body. Wandering third instar  
188 stage larvae were picked out for imaging analysis. The *Drosophila* images are created  
189 by BioRender.com. (B) Exemplar confocal images of transgenic *Drosophila* fat body  
190 cells showing collagen COL4A1 secretion is normal with control RNAi (left), and  
191 intracellular procollagen accumulation with *tmem39/CG13016* RNAi. scale bar, 100  $\mu\text{m}$ .

192 Since the sequence and function of TMEM39 family proteins appear to be highly  
193 conserved, we next characterized the localization and protein interactors of human  
194 TMEM39A. The vertebrate TMEM39 family consists of two paralogs, TMEM39A and  
195 TMEM39B (33). The *TMEM39B* gene is only conserved in vertebrates, and is likely  
196 produced by the duplication of an ancestral form of *TMEM39A* (34). Consistent with a  
197 recent study (28), our confocal imaging of HeLa cells transiently transfected with  
198 reporters of GFP::TMEM39A and mCherry-tagged ER markers indicates that  
199 TMEM39A localized to the ER (Fig 4A).

200 **Fig 4. TMEM39A interacts with Sec23A to regulate collagen secretion in *C.***  
201 ***elegans*.**

202 (A) Exemplar confocal fluorescence images of HeLa cells co-transfected with GFP-  
203 tagged TMEM39A and mCherry-tagged ER marker (ER3). Scale bars, 5  $\mu$ m. (B)  
204 Schematic of human TMEM39A transmembrane domain predicted by the TOPCONS  
205 program, with cytosolic localization in red (two long cytoplasmic loop domains labeled  
206 with rectangles, loop1 in green and loop2 in blue) and ER localization in blue. (C)  
207 Schematic of Y2H screens identifying the human Sec23A C-terminal domain as a  
208 binder of the second cytoplasmic loop domain of TMEM39A. (D) Y2H assays of yeast  
209 colony growth after prey and bait vectors retransformation to verify the interaction of  
210 human Sec23A C-termini (a.a. 583-765), Sec24D full length (a.a. 1-1032) and Dctn6  
211 full length (a.a. 1-190) with TMEM39A loop1 (a.a. 198-298) and loop2 (a.a. 337-420).  
212 (E) Coimmunoprecipitation and Western blot of mCherry-labeled TMEM39A  
213 cytoplasmic loop domain and GFP-labeled Sec23A Ct fragment in human embryonic  
214 kidney (HEK) 293 cells. Cells were transfected with expression vectors, lysed for  
215 immunoprecipitation by GFP-TRAP, and blotted by antibodies against GFP and  
216 mCherry. (F-G) Exemplar confocal fluorescence images of COL-19::GFP (F) and *hsp-*  
217 *4p*::GFP (G) with indicated phenotypic penetrance of wild-type with control RNAi and  
218 COPII components *sec-23* and *trpp-3* RNAi. Scale bars: 20  $\mu$ m. (H) Y2H assays of  
219 yeast colony growth after prey and bait vectors retransformation to verify the interaction  
220 between human Sec23A C-termini with human wild type and YR mutant TMEM39A  
221 cytoplasmic loop domain.

222 **Human TMEM39A cytoplasmic loop domain interacts with Sec23A**

223 Predicted by the TOPCONS program, TMEM-39 contains putatively eight

224 transmembrane segments and two large cytoplasmic loops (Fig 4B). We further used  
225 the Y2H screen to search for human proteins that could interact with the conserved  
226 first loop domain (198-298 a.a.) and the second loop domain (337-420 a.a.) of  
227 TMEM39A (Fig 4C). Among the prey cDNA clones identified from the Y2H screen,  
228 Sec23A was confirmed to interact with the second loop domain of TMEM39A (Fig 4D).  
229 The cDNA clone from the Y2H library encodes the C-terminal 583-765 a.a. of Sec23A,  
230 encompassing the Gelsolin repeat and C-terminal actin depolymerization factor-  
231 homology domain (Fig 4C). Sec23A is a core component of the COPII vesicle coating  
232 complex, which forms SEC23-SEC24 heterodimers in the inner shell of the COPII coat  
233 to select specific cargo molecules (35, 36). Mutations in human Sec23A cause an  
234 autosomal recessive disease, named Cranio-lenticulo-sutural dysplasia (CLSD) (35).  
235 The disease manifests with skeletal abnormalities, dysmorphic facial features and  
236 calvarial hypomineralization, features thought to result from defects in collagen  
237 secretion (37). Consistent with recent studies using the CoIP assay to demonstrate  
238 association between TMEM39A and Sec23A (28), we found that TMEM39A interacted  
239 with Sec23A but not Sec24D in Y2H assays (Figs 4D-E). These results indicate that  
240 the TMEM39A cytoplasmic loop domain interacts specifically with Sec23A, which forms  
241 an inner-shell heterodimer with Sec24 to drive procollagen secretion.

242 We next examined the loss-of-function phenotype of *sec-23*. RNAi knock-down of *sec-*  
243 *23*, the *C. elegans* homolog of Sec23A, strongly reduced COL-19::GFP secretion in  
244 the cuticle and increased its aggregation in the intracellular region of hypoderm (Fig  
245 4F). RNAi of *sec-23* also led to strong *hsp-4p*::GFP induction, indicating constitutively

246 activated ER stress response (Fig 4G). RNAi against genes encoding other  
 247 components of COPII also recapitulated the COL-19::GFP defect and *hsp-4p::GFP*  
 248 induction phenotype (Figs 4F-G, S4-5 and Table 1).

249 **Table 1. RNAi of COPII-related genes for ER stress and collagen secretion**  
 250 **phenotype analysis.**

| Gene            | Description                     | ER   | collagen | Other phenotype |
|-----------------|---------------------------------|------|----------|-----------------|
| <i>tmem-39</i>  | Recruit Sec23A                  | +++  | ----     | Dpy, Sma, Rup   |
| <i>tmem-131</i> | Recruit TRAPPC8,<br>procollagen | +++  | ----     | Dpy, Sma, Rup   |
| <i>sec-23</i>   | COPII component                 | +++  | ----     | Lva (L1-L2)     |
| <i>sec-24.1</i> | COPII component                 | +++  | ----     | Lva (L1-L2)     |
| <i>sec-24.2</i> | COPII component                 | N.D. | N.D.     | N.D.            |
| <i>npp-20</i>   | Sec13, COP II component         | +++  | N.D.     | Lva (L4), Rup   |
| <i>sec-31</i>   | COPII component                 | +    | N.D.     | N.D.            |
| <i>sar-1</i>    | GTPase, interact with sec-12    | +++  | --       | Lva (L4), Rup   |
| <i>sec-12</i>   | GTP-binding Sar1 protein        | +++  | N.D.     | Lva (L1-L2)     |
| <i>rab-1</i>    | Rab GTPase                      | +++  | ----     | Lva (L1-L2)     |
| <i>trpp-3</i>   | TRAPPIII component              | ++   | ----     | N.D.            |
| <i>trpp-6</i>   | TRAPPIII component              | N.D. | ----     | N.D.            |
| <i>trpp-8</i>   | TRAPPIII component              | N.D. | ----     | Ste             |
| <i>uso-1</i>    | USO1 vesicle transport factor   | +++  | N.D.     | N.D.            |

251 ER, *hsp-4p::gfp* induction for ER stress; collagen, *col-19::gfp* defect; + and -, indicate  
 252 fluorescent reporter induction and reduction, respectively. N.D., no significant  
 253 difference. Dpy (Dumpy), shorter and stouter than control animals at the same  
 254 developmental stage; Sma (Small), shorter and thinner than control animals at the  
 255 same developmental stage; Lva (larval arrest), the developmental program of the  
 256 animals halts at any larval stage (L1-L4); Rup (exploded through vulva), animals are  
 257 ruptured at the vulva and display an extrusion of internal organs at the site of rupture;  
 258 Ste (sterile), animals are unable to produce progeny.

259 By amino acid sequence alignment, we identified two Tyrosine-Arginine (YR) residues  
 260 in the second cytoplasmic loop domain of TMEM39A that are highly evolutionarily

261 conserved among all examined species from invertebrates to vertebrates (S1 Fig). To  
262 test whether the conserved YR motif is important for interaction with Sec23A, we  
263 substituted the YR motif of TMEM39A into Alanine-Alanine (AA). Using Y2H assays,  
264 we found that such substitution in TMEM39A strongly attenuated its interaction with  
265 Sec23A (Fig 4H). These results show that the second cytoplasmic loop domain of  
266 TMEM39A specifically binds to the COPII inner-shell component Sec23A and its *C.*  
267 *elegans* homolog *sec-23* is also essential for collagen production *in vivo*.

## 268 **The collagen secretion phenotype of *tmem-39* is independent of ER stress and** 269 **autophagy**

270 We identified both *tmem-39* and *tmem-131* from the genome-wide screen for RNAi  
271 clones affecting the abundance of *asp-17p::GFP*, which is downregulated by ER stress  
272 (22). We examined collagen secretion phenotypes of other genes involved in protein  
273 modification and homeostasis in the ER identified from the *asp-17p::GFP* screen,  
274 including *ostb-1*, *nus-1*, *stt-3*, *dlst-1*, *ost-3* and *uggt-1* (Fig 5A and S4 Table). RNAi  
275 against these genes, similarly as *tmem-39* and *tmem-131*, caused marked suppression  
276 of *asp-17p::GFP* and induction of *hsp-4p::GFP* (Figs 5A-B). By contrast, RNAi knock-  
277 down of these genes did not cause COL-19::GFP collagen secretion defects (Figs 5C-  
278 D and S6A-C). We also examined additional genes that are not from the *asp-17p::GFP*  
279 screen but affect the ER stress response, including *xpb-1*, *ire-1*, *cdc-48.1*, *manf-1* and  
280 *sdf-2* in *C. elegans* (38-42). RNAi against these genes induced *hsp-4p::GFP* (Fig 5E),  
281 but did not result in collagen secretion defects (Figs 5F-G and S6D-F). These results  
282 indicate that the ER stress response is likely a consequence but not cause of cuticle

283 secretion defects in *C. elegans* deficient in TMEM-39.

284 **Fig 5. RNAi knock-down of ER stress response-related genes does not cause**  
285 **defects in collagen secretion.**

286 (A) Table listing ER proteostasis genes whose RNAi also suppressed *rrf-3*; *asp-*  
287 *17p::GFP* ( $n \geq 20$  for each group). (B) Exemplar fluorescence and bright-field images  
288 for the UPR reporter *hsp-4p::GFP* with control and *ostb-1* RNAi in wild type animals.  
289 Scale bars: 20  $\mu\text{m}$ . (C-D) Exemplar confocal fluorescence images of COL-19::GFP in  
290 control RNAi and ER proteostasis gene in wild-type animals (C), scale bars: 20  $\mu\text{m}$ ,  
291 and Western blot analysis (D). Arrows indicate soluble premature monomers; triangles  
292 indicate insoluble mature monomers and cross-linked COL-19::GFP. (E) Exemplar  
293 fluorescence images for the UPR reporter *hsp-4p::GFP* with control and *manf-1* RNAi  
294 in wild type animals. Scale bars: 20  $\mu\text{m}$ . (F-G) Exemplar confocal fluorescence images  
295 (F) and Western blot analysis (G) of COL-19::GFP with control and ER stress response  
296 gene RNAi in wild-type animals. Scale bars: 20  $\mu\text{m}$ .

297 A recent study reported that mammalian TMEM39A regulates autophagy by controlling  
298 the trafficking of the PtdIns(4)P Phosphatase SAC1 from ER to Golgi (28). The SAC1  
299 protein family is evolutionarily conserved among eukaryotes, while *C. elegans* has two  
300 paralogs, named SAC-1 and SAC-2 (S7 Fig). We next examined whether  
301 dysregulation of SAC-1 and autophagy might contribute to the defective collagen  
302 secretion phenotype in *tmem-39* mutants. We first confirmed that *sac-1* or *tmem-39*  
303 RNAi, but not *sac-2* RNAi, caused a marked up-regulation of the autophagy  
304 transcriptional reporter *tts-1p::GFP* (Fig 6A). *tts-1* is a long non-coding RNA that  
305 represses protein synthesis and is activated by HLH-30/TFEB, a master transcriptional  
306 regulator of autophagy (43, 44). However, *sac-1* RNAi did not affect the ER stress  
307 response reporter *hsp-4p::GFP* (Fig 6B) or COL-19::GFP (Figs 6C-D). We also  
308 examined RNAi phenotypes of *let-363*, which encodes an ortholog of human mTOR  
309 (mechanistic target of rapamycin kinase) and regulates autophagy in *C. elegans* (45,  
310 46). Similarly as *sac-1* RNAi, *let-363* knock-down in *C. elegans* showed a marked

311 induction of *tts-1p::GFP* but has no apparent effects on collagen secretion (Figs 6 E-  
312 G). Together, these findings indicate that roles of *C. elegans* TMEM-39 in collagen  
313 secretion are independent of ER stress response and autophagy regulation.

314 **Fig 6. Collagen secretion is independent of ER stress and autophagy induction.**  
315 (A-C) Exemplar epifluorescence images of the autophagy induction reporter *tts-*  
316 *1p::GFP* (A), UPR reporter *hsp-4p::GFP* (B) and COL-19::GFP (C) in *sac-1*, *sac-2* and  
317 *tmem-39* RNAi treated animals. Scale bars: 20  $\mu$ m. (D) Western blot analysis of COL-  
318 19::GFP in *sac-1*, *sac-2* and *tmem-39* RNAi treated animals. Arrows indicate soluble  
319 premature monomers; triangles indicate insoluble mature monomers and cross-linked  
320 COL-19::GFP. (E) Exemplar epifluorescence images of *tts-1p::GFP* with control and  
321 *let-363* RNAi in wild type animals. Scale bars: 20  $\mu$ m. (F) Exemplar confocal  
322 fluorescence images of COL-19::GFP in control and *let-363* RNAi in wild-type animals .  
323 Scale bars: 20  $\mu$ m. (G) Western blot analysis of COL-19::GFP.

## 324 Discussion

325 Our study identifies an ER-transmembrane protein TMEM-39 in *C. elegans* with  
326 essential roles in collagen secretion. Such roles are likely evolutionarily conserved in  
327 animals. We propose that the conserved TMEM39 cytoplasmic loop domain binds to  
328 the Sec23 component of COPII-coating complex to facilitate ER-to-Golgi procollagen  
329 transport. Phenotypic similarities of losses of TMEM-39 and TMEM-131, another ER  
330 transmembrane protein we recently identified (22), suggest that both proteins  
331 cooperate in collagen secretion by assembling premature collagen and recruiting  
332 COPII/TRAPP III complexes for sequential ER-to-Golgi cargo transport (Fig 7).

## 333 Fig 7. Schematic model showing TMEM39 regulation of collagen secretion.

334 The second cytoplasmic loop domain of TMEM39A interacts with the core COPII  
335 coating component Sec23A. TMEM131 binds to COL1A2 to facilitate assembly of  
336 procollagen trimers and TRAPP III activation of Rab GTPase, in coordination with  
337 TMEM39A to promote the ER-to-Golgi transport of procollagen cargo in COPII. Uso1  
338 interacts with the COPII vesicle to promote targeting to the Golgi apparatus.

339 By yeast-two-hybrid assays, we found that the TMEM39A cytoplasmic loop domain can



340 interact with the Sec23A. RNAi knock-down of *sec-23* and most other COPII genes  
341 recapitulated the *tmem-39* loss-of-function phenotypes in constitutively high ER stress  
342 response, defective collagen secretion and sensitivity to osmolality stress in *C. elegans*  
343 (Table 1). We also noticed that RNAi knock-down of many COPII related genes, such  
344 as *sec-23*, *sec-24.1*, *npp-20*, *sar-1*, *sec-12*, *rab-5* and *trpp-8* caused more severe  
345 phenotypes than *tmem-39* RNAi, leading to lethality or developmental arrest that  
346 prevent collagen phenotype analysis (Table 1). However, treatment with these RNAi  
347 starting from L4-stage for animals transferred from normal conditions to RNAi led to  
348 robust COL-19::GFP phenotype (Figs 4F and S4). Shorter duration of RNAi treatment  
349 may explain milder collagen defective phenotype for *sec-31*, *npp-20* and *sec-12* (Figs  
350 S4E, H and I). Compared with most COPII-related genes, *tmem-39* null mutants exhibit  
351 similar collagen secretion defects but are nonetheless viable, supporting the notion  
352 that TMEM-39 acts with COPII in collagen secretion but may have more specialized  
353 roles in facilitating secretion of specific client proteins including collagen COL-19 and  
354 the PtdIns(4)P Phosphatase SAC1 (28).

355 Recent work showed that TMEM39A facilitates the ER-to-Golgi transport of SAC1 and  
356 regulates autophagosome formation (28). We found that RNAi knock-down of  
357 autophagy related genes, such as *sac-1* and *let-363*, caused autophagy induction but  
358 did not affect the ER stress response or collagen secretion (Fig 6). Genes identified  
359 from the *asp-17p::GFP* screen that regulate the ER stress response also did not affect  
360 collagen secretion (S4 Table), further supporting the notion that roles of TMEM-39 in  
361 collagen secretion are independent of ER stress response and autophagy.



362 Besides Sec23A, additional interactors were identified from Y2H screens with the  
363 TMEM39A cytoplasmic domain as bait. We verified the interaction between full-length  
364 DCTN6 (1-190 a.a.) and TMEM39A (337-420 a.a.) (Fig 4D). DCTN6 is a subunit of the  
365 dynactin protein complex (47) that acts as an essential cofactor of the cytoplasmic  
366 dynein motor to transport a variety of cargos and organelles along the microtubule-  
367 based cytoskeleton (48, 49). In mammalian cells, ER-to-Golgi transport proceeds by  
368 cargo assembly into COPII-coated ER export sites (ERES) followed by  
369 vesicular/tubular transport along microtubule tracks toward the Golgi in a  
370 dynein/dynactin-dependent manner (50). Sec23p directly interacts with the dynactin  
371 complex (50), indicating that TMEM39A may participate in a Sec23/DCTN6 complex  
372 to facilitate COPII coat assembly and subsequent dynein/dynactin-dependent  
373 transport. Test of this hypothetical model and determination of the underlying mechanism  
374 in relation to TMEM131's role in collagen secretion await further investigations.

375 Mammalian genomes encode two TMEM39 family proteins, TMEM39A and TMEM39B.  
376 *TMEM39A* is a susceptibility locus associated with various autoimmune diseases and  
377 highly up-regulated in brain tumors (33, 51). TMEM39B was recently found to interact  
378 with the SARS-CoV-2 ORF9C protein, which localizes to ER-derived vesicles (52, 53).  
379 It remains unknown whether *TMEM39A* and *TMEM39B* exhibit functional redundancy  
380 in physiological collagen secretion or pathological processes in human diseases. With  
381 single *tmem39* orthologue for each, model organisms *C. elegans* and *Drosophila* may  
382 continue to provide insights into functions and mechanisms of action of this protein  
383 family. Future elucidation of evolutionarily conserved roles of mammalian TMEM39

384 proteins in physiological and pathological processes may lead to therapeutic targets

385 and strategies for treating diseases associated with this protein family in humans.

## 386 **Materials and Methods**

### 387 **Worm Strains**

388 The Bristol N2 strain was used as the wild type strain, and genotypes of other strains  
389 used are as follow: *zcls4* [*hsp-4p::GFP*] V, *ire-1(zc14)* II; *zcls4* V, *dmals10* [*asp-*  
390 *17p::GFP*; *unc-54p::mCherry*] X, *nls617* [*tts-1p::GFP*, *unc-54p::mCherry*] and *kals12*  
391 [*col-19::GFP*], *tmem-39(dma258)* and *tmem-39(dma312)* I. Transgenic strains  
392 *dmaEx169* [*rpl-28p::T19D2.1::mCherry*; *unc-122p::GFP*], *dmaEx153* [*rpl-*  
393 *28p::Y73E7A.8::mCherry*; *unc-122p::GFP*], and *dmaEx152* [*rpl-*  
394 *28p::F23H12.5::mCherry*; *unc-122p::GFP*] were generated as extrachromosomal  
395 arrays as described (54).

396 The precise *tmem-39(dma258)* knock-out strain was generated by CRISPR/Cas9  
397 methods (55, 56). Primer sequences are listed in Supporting Information Tables S1-2.  
398 Translational fluorescent reporters used by *tmem-39* RNAi knock-down to identify a  
399 phenotype include: *bcls39* [*lim-7p::ced-1::GFP+lin-15(+)*], *cals618* [*eff-1p::eff-1::GFP*],  
400 *dnSi4* [*gna-1p::GFP* + Cbr-*unc-119(+)*], *juEx1111* [*spon-1::vGFP*], *lrp-1(ku156)eqIs1*  
401 [*lrp-1p::lrp-1::GFP*] I; *rff-3(pk1426)* II, *mulS49* [*egl-20::GFP+unc-22(+)*], *nls590* [*fat-*  
402 *7p::fat-7::GFP*], *nuls26* [*cat-1::GFP*], *osls60* [*unc-54p::mig-23::GFP*; *unc-119(+)*],  
403 *osls66* [*myo-3p::eGFP::wrk-1*], *sqs11* [*lgg-1p::mCherry::GFP::lgg-1+rol-6(+)*], *osls77*  
404 [*unc-54p::RFP::SP12;unc-119(+)*], *pwls503* [*vha-6p::mans::GFP+Cbr-unc-119(+)*],  
405 *qyls44* [*emb-9p::emb-9::mCherry*], *rhls23* [*GFP::him-4*], *vels13* [*col-19::GFP* + *rol-6(+)*]  
406 V; *let-7(mn112) unc-3(e151)* X; *mgEx725* [*lin-4::let-7* + *ttx-3::RFP*], *vkEx1243* [*nhx-*  
407 *2p::ubiquitin-V::mCherry+myo-2p::GFP*], *vkEx1256* [*nhx-2p::cpl-1::YFP*], *vkEx1260*

408 [*nhx-2p::cpl-1::YFP*], *vkEx1879* [*nhx-2p::cpl-1(W32A Y35A)::YFP*] and *xnls96* [*hmr-*  
409 *1p::hmr-1::GFP*].

#### 410 **Worm maintenance**

411 *C. elegans* strains were maintained in standard nematode growth medium (NGM)  
412 plates with seeded *E. coli* at 20 °C (57). Worm stages were synchronized by bleaching  
413 the gravid adults, and bacterial feeding-induced RNAi knock-down was performed as  
414 previously described (58). For RNAi colonies that show lethality or larvae arrest  
415 phenotypes, around 20-30 P0 L4 animals were transferred from normal NGM plates to  
416 RNAi plates, and grew for 2-3 days to observe the P0 phenotype.

#### 417 **Imaging**

418 Digital automated epifluorescence microscopes (EVOS, Life Technologies) and SPE  
419 confocal microscope (Leica) were used to obtain fluorescence images. Animals at the  
420 same stage were randomly picked from the plate, and transferred to a 4% agar pad  
421 with 10 mM sodium azide and 1 mM levamisole in M9 solution (31742-250MG, Sigma-  
422 Aldrich) on a slide for imaging. Identical setting and conditions were used to compare  
423 experimental groups with controls.

#### 424 **Co-immunoprecipitation**

425 HEK293T cells were transfected with the indicated plasmids, following the instruction  
426 of TurboFect Transfection Reagent (Thermo Fisher Scientific, R0531). After  
427 transfection for 48 hr, cells were lysed on ice for 30 min in cell lysis buffer (Cell signaling,  
428 9803) with protease inhibitor cocktail (SIGMA 11836153001). After centrifugation at

429 13,000 rpm for 15 mins at 4 °C, supernatants were collected and precleaned by control  
430 magnetic beads (bmab-20, ChromoTek) for 30 mins at 4 °C, and followed by  
431 immunoprecipitation with GFP-Trap agarose beads (gtma-10, ChromoTek) for 2 hr at  
432 4 °C. After washing with 1XPBS for 4 times and cell lysis buffer for 1 time at 4 degree,  
433 the bound proteins were eluted with 1xSDS Laemmli Sample Buffer with 10%  $\beta$ -  
434 mercaptoethanol and analyzed by immunoblotting.

#### 435 **Western blot analysis of proteins**

436 Animals at the same stage from the control and experiment groups were picked (N>30)  
437 into 20  $\mu$ L Laemmli Sample Buffer with 10%  $\beta$ -mercaptoethanol and lysed directly for  
438 Western blot analysis. Protein samples were run with 15% SDS-PAGE (Bio-Rad,  
439 4561084), and then transferred to the nitrocellulose membrane (Bio-Rad, 1620167).  
440 The membranes were blotted by antibodies against GFP (A02020, Abbkine), mCherry  
441 (Invitrogen, M11217), Tubulin (Sigma, T5168) and H3 (Abcam, ab1791).

#### 442 **Quantitative RT-PCR**

443 Worm total RNA was extracted by following the protocol of Quick-RNA MiniPrep kit  
444 (Zymo Research, R1055). cDNA was reverse transcribed by the reverse transcriptase  
445 mix kit (BioTools, B24408). Using SYBR Green Supermix (Thermo Fisher Scientific,  
446 FERK1081), the real-time qPCR was performed on the Roche LightCycler96 (Roche,  
447 05815916001) system. Ct values of specific genes were normalized to the *C. elegans*  
448 housekeeping gene *act-1* levels. Results were presented as fold changes to respective  
449 references. Statistical significance was determined with t-test, using GraphPad Prism  
450 7. Primer sequences are listed in Supporting information S2 Table.

451 ***Drosophila* experiments**

452 Fly strains included: UAS-Cg25C:RFP.2.1/CyO; Lsp2-Gal4/TM6B, and UAS-  
453 CG13016\_dsRNA (Vienna Drosophila Resource Center ID# 42509/GD). Lsp2-Gal4 is  
454 specifically expressed in the fat body cells. Flies expressing Collagen:RFP in fat body  
455 were crossed to either wild type or UAS-CG13016\_dsRNA flies. Wandering-stage third  
456 instar larvae were picked out. Fat body was dissected and fixed in 4% PFA, stained  
457 with DAPI, and mounted for imaging by confocal microscopy.

458 **Yeast-two-hybrid assay**

459 The cDNA coding sequences of the first and second cytoplasmic loop domain of  
460 human TMEM39A were cloned into the pGBKT7 vector and screened against a  
461 normalized universal human cDNA library (Clontech, 630481), following instruction of  
462 the Matchmaker® Gold Yeast Two-Hybrid System (Clontech, 630489). Verification of  
463 positive colonies was achieved by co-transforming wild-type or YR-mutant TMEM39A  
464 loop domain (in pGBKT7 Vector) with genes of interest (in pGADT7 Vector) following  
465 the instruction of YeastMaker™ Yeast Transformation System 2 (Clontech, 630439) as  
466 well as plasmids from re-cloned cDNA.

467 **Fluorescent imaging of HeLa cells**

468 HeLa cells were seeded in 24-well plates with cover glass, each with three replicates  
469 (Fisher Scientific, 22293232). Cells were transiently transfected with GFP-tagged  
470 human *TMEM39A* full-length cDNA in the FUGW plasmid backbone, and the ER  
471 localization marker mCherry-ER-3 (Addgene: 55041) for 2 days. After 1xPBS washing  
472 for once, cells were treated by 4% formaldehyde solution for 10 mins. With 1xPBS

473 washing for three times, cells were treated with 0.2% Triton X-100 in 1xPBS solution  
474 for 15 mins. Following 1xPBS washing for three times, the cover slide with cell samples  
475 was sealed on the microscope slide with Fluoroshield Mounting Medium with DAPI  
476 (Thermo Fisher Scientific, NC0200574) for imaging by confocal microscopy.

477 **Acknowledgements**

478 We thank the *Caenorhabditis* Genetics Center for *C. elegans* strains and acknowledge  
479 funding support from NIH grant R01GM117461, Pew Scholar Award, Shurl & Kay Curci  
480 Foundation Faculty Scholars Program of the Innovative Genomics Institute and  
481 Packard Fellowship in Science and Engineering (to D.K.M). We thank Drs. Hong Zhang,  
482 Kamran Atabai and Matthew Shoulders for discussion and Dr. Jose Pastor-Pareja for  
483 the transgenic *Drosophila* line: *w\**; UAS-Cg25C.RFP.2.1. The authors declare that they  
484 have no competing interests and all participated experimental design, execution or  
485 data interpretation and analysis. Z.Z. and D.K.M wrote the paper.



## 486 **References**

- 487 1. Shoulders MD, Raines RT. Collagen structure and stability. *Annu Rev Biochem.*  
488 2009;78:929-58.
- 489 2. Humphreys BD. Mechanisms of Renal Fibrosis. *Annu Rev Physiol.* 2018;80:309-  
490 26.
- 491 3. McKleroy W, Lee TH, Atabai K. Always cleave up your mess: targeting collagen  
492 degradation to treat tissue fibrosis. *Am J Physiol Lung Cell Mol Physiol.*  
493 2013;304(11):L709-21.
- 494 4. Murtha LA, Schuliga MJ, Mabotuwana NS, Hardy SA, Waters DW, Burgess JK, et  
495 al. The Processes and Mechanisms of Cardiac and Pulmonary Fibrosis. *Front*  
496 *Physiol.* 2017;8:777.
- 497 5. Wynn TA, Ramalingam TR. Mechanisms of fibrosis: therapeutic translation for  
498 fibrotic disease. *Nat Med.* 2012;18(7):1028-40.
- 499 6. Timpane S, Brandling-Bennett H, Kristjansson AK. Autoimmune collagen vascular  
500 diseases: Kids are not just little people. *Clin Dermatol.* 2016;34(6):678-89.
- 501 7. Ewald CY, Landis JN, Porter Abate J, Murphy CT, Blackwell TK. Dauer-  
502 independent insulin/IGF-1-signalling implicates collagen remodelling in longevity.  
503 *Nature.* 2015;519(7541):97-101.
- 504 8. Mienaltowski MJ, Birk DE. Structure, physiology, and biochemistry of collagens.  
505 *Adv Exp Med Biol.* 2014;802:5-29.
- 506 9. Jensen D, Schekman R. COPII-mediated vesicle formation at a glance. *Journal of*  
507 *cell science.* 2011;124(1):1-4.
- 508 10. Barlowe C, Helenius A. Cargo Capture and Bulk Flow in the Early Secretory  
509 Pathway. *Annu Rev Cell Dev Biol.* 2016;32:197-222.
- 510 11. D'Arcangelo JG, Stahmer KR, Miller EA. Vesicle-mediated export from the ER:  
511 COPII coat function and regulation. *Biochim Biophys Acta.* 2013;1833(11):2464-  
512 72.
- 513 12. Barrowman J, Bhandari D, Reinisch K, Ferro-Novick S. TRAPP complexes in  
514 membrane traffic: convergence through a common Rab. *Nat Rev Mol Cell Biol.*  
515 2010;11(11):759-63.
- 516 13. Barlowe C. Twenty-five years after coat protein complex II. *Mol Biol Cell.*  
517 2020;31(1):3-6.
- 518 14. Malhotra V, Erlmann P. The pathway of collagen secretion. *Annu Rev Cell Dev Biol.*  
519 2015;31:109-24.
- 520 15. Malhotra V, Erlmann P, Nogueira C. Procollagen export from the endoplasmic  
521 reticulum. *Biochem Soc Trans.* 2015;43(1):104-7.

- 522 16. Santos AJ, Raote I, Scarpa M, Brouwers N, Malhotra V. TANGO1 recruits ERGIC  
523 membranes to the endoplasmic reticulum for procollagen export. *Elife*. 2015;4.
- 524 17. Ito S, Nagata K. Roles of the endoplasmic reticulum-resident, collagen-specific  
525 molecular chaperone Hsp47 in vertebrate cells and human disease. *J Biol Chem*.  
526 2019;294(6):2133-41.
- 527 18. Wilson DG, Phamluong K, Li L, Sun M, Cao TC, Liu PS, et al. Global defects in  
528 collagen secretion in a Mia3/TANGO1 knockout mouse. *J Cell Biol*.  
529 2011;193(5):935-51.
- 530 19. Yuan L, Kenny SJ, Hemmati J, Xu K, Schekman R. TANGO1 and SEC12 are  
531 copackaged with procollagen I to facilitate the generation of large COPII carriers.  
532 *Proc Natl Acad Sci U S A*. 2018;115(52):E12255-E64.
- 533 20. Raote I, Ernst AM, Campelo F, Rothman JE, Pincet F, Malhotra V. TANGO1  
534 membrane helices create a lipid diffusion barrier at curved membranes. *Elife*.  
535 2020;9.
- 536 21. Matsui Y, Hirata Y, Wada I, Hosokawa N. Visualization of Procollagen IV Reveals  
537 ER-to-Golgi Transport by ERGIC-independent Carriers. *Cell Struct Funct*.  
538 2020;45(2):107-19.
- 539 22. Zhang Z, Bai M, Barbosa GO, Chen A, Wei Y, Luo S, et al. Broadly conserved  
540 roles of TMEM131 family proteins in intracellular collagen assembly and secretory  
541 cargo trafficking. *Sci Adv*. 2020;6(7):eaay7667.
- 542 23. Page AP, Johnstone IL. The cuticle. *WormBook*. 2007:1-15.
- 543 24. Chioran A, Duncan S, Catalano A, Brown TJ, Ringuette MJ. Collagen IV trafficking:  
544 The inside-out and beyond story. *Dev Biol*. 2017;431(2):124-33.
- 545 25. Kramer JM. Basement membranes. *WormBook*. 2005:1-15.
- 546 26. Teuscher AC, Jongsma E, Davis MN, Statzer C, Gebauer JM, Naba A, et al. The  
547 in-silico characterization of the *Caenorhabditis elegans* matrisome and proposal  
548 of a novel collagen classification. *Matrix Biology Plus*. 2019;1:100001.
- 549 27. Thein MC, McCormack G, Winter AD, Johnstone IL, Shoemaker CB, Page AP.  
550 *Caenorhabditis elegans* exoskeleton collagen COL-19: an adult-specific marker  
551 for collagen modification and assembly, and the analysis of organismal  
552 morphology. *Dev Dyn*. 2003;226(3):523-39.
- 553 28. Miao G, Zhang Y, Chen D, Zhang H. The ER-Localized Transmembrane Protein  
554 TMEM39A/SUSR2 Regulates Autophagy by Controlling the Trafficking of the  
555 PtdIns(4)P Phosphatase SAC1. *Mol Cell*. 2020;77(3):618-32 e5.
- 556 29. Harding HP, Zhang Y, Zeng H, Novoa I, Lu PD, Calton M, et al. An integrated stress  
557 response regulates amino acid metabolism and resistance to oxidative stress. *Mol*  
558 *Cell*. 2003;11(3):619-33.

- 559 30. Ihara S, Hagedorn EJ, Morrissey MA, Chi Q, Motegi F, Kramer JM, et al. Basement  
560 membrane sliding and targeted adhesion remodels tissue boundaries during  
561 uterine-vulval attachment in *Caenorhabditis elegans*. *Nat Cell Biol*.  
562 2011;13(6):641-51.
- 563 31. Pastor-Pareja JC, Xu T. Shaping cells and organs in *Drosophila* by opposing roles  
564 of fat body-secreted Collagen IV and perlecan. *Dev Cell*. 2011;21(2):245-56.
- 565 32. Liu M, Feng Z, Ke H, Liu Y, Sun T, Dai J, et al. Tango1 spatially organizes ER exit  
566 sites to control ER export. *J Cell Biol*. 2017;216(4):1035-49.
- 567 33. Park J, Lee H, Tran Q, Mun K, Kim D, Hong Y, et al. Recognition of  
568 Transmembrane Protein 39A as a Tumor-Specific Marker in Brain Tumor. *Toxicol*  
569 *Res*. 2017;33(1):63-9.
- 570 34. Kumar S, Stecher G, Suleski M, Hedges SB. TimeTree: A Resource for Timelines,  
571 Timetrees, and Divergence Times. *Mol Biol Evol*. 2017;34(7):1812-9.
- 572 35. Khoriaty R, Hesketh GG, Bernard A, Weyand AC, Mellacheruvu D, Zhu G, et al.  
573 Functions of the COPII gene paralogs SEC23A and SEC23B are interchangeable  
574 in vivo. *Proc Natl Acad Sci U S A*. 2018;115(33):E7748-E57.
- 575 36. Bi X, Corpina RA, Goldberg J. Structure of the Sec23/24-Sar1 pre-budding  
576 complex of the COPII vesicle coat. *Nature*. 2002;419(6904):271-7.
- 577 37. Boyadjiev SA, Kim SD, Hata A, Haldeman-Englert C, Zackai EH, Naydenov C, et  
578 al. Cranio-lenticulo-sutural dysplasia associated with defects in collagen secretion.  
579 *Clin Genet*. 2011;80(2):169-76.
- 580 38. Calton M, Zeng H, Urano F, Till JH, Hubbard SR, Harding HP, et al. IRE1 couples  
581 endoplasmic reticulum load to secretory capacity by processing the XBP-1 mRNA.  
582 *Nature*. 2002;415(6867):92-6.
- 583 39. Sasagawa Y, Yamanaka K, Ogura T. ER E3 ubiquitin ligase HRD-1 and its specific  
584 partner chaperone BiP play important roles in ERAD and developmental growth in  
585 *Caenorhabditis elegans*. *Genes Cells*. 2007;12(9):1063-73.
- 586 40. Dang H, Klock TI, Schaheen B, McLaughlin BM, Thomas AJ, Durns TA, et al.  
587 Derlin-dependent retrograde transport from endosomes to the Golgi apparatus.  
588 *Traffic*. 2011;12(10):1417-31.
- 589 41. Bai M, Vozdek R, Hnizda A, Jiang C, Wang B, Kuchar L, et al. Conserved roles of  
590 *C. elegans* and human MANFs in sulfatide binding and cytoprotection. *Nat*  
591 *Commun*. 2018;9(1):897.
- 592 42. Glover-Cutter KM, Lin S, Blackwell TK. Integration of the unfolded protein and  
593 oxidative stress responses through SKN-1/Nrf. *PLoS Genet*. 2013;9(9):e1003701.

594

595

- 596 43. Essers PB, Nonnekens J, Goos YJ, Betist MC, Viester MD, Mossink B, et al. A  
597 Long Noncoding RNA on the Ribosome Is Required for Lifespan Extension. *Cell*  
598 *Rep.* 2015;10(3):339-45.
- 599 44. Nakamura S, Karalay O, Jager PS, Horikawa M, Klein C, Nakamura K, et al.  
600 Mondo complexes regulate TFE3 via TOR inhibition to promote longevity in  
601 response to gonadal signals. *Nat Commun.* 2016;7:10944.
- 602 45. Melendez A, Levine B. Autophagy in *C. elegans*. *WormBook.* 2009:1-26.
- 603 46. Jung CH, Ro SH, Cao J, Otto NM, Kim DH. mTOR regulation of autophagy. *FEBS*  
604 *Lett.* 2010;584(7):1287-95.
- 605 47. Eckley DM, Gill SR, Melkonian KA, Bingham JB, Goodson HV, Heuser JE, et al.  
606 Analysis of dynactin subcomplexes reveals a novel actin-related protein  
607 associated with the arp1 minifilament pointed end. *J Cell Biol.* 1999;147(2):307-  
608 20.
- 609 48. Urnavicius L, Zhang K, Diamant AG, Motz C, Schlager MA, Yu M, et al. The  
610 structure of the dynactin complex and its interaction with dynein. *Science.*  
611 2015;347(6229):1441-6.
- 612 49. Reck-Peterson SL, Redwine WB, Vale RD, Carter AP. The cytoplasmic dynein  
613 transport machinery and its many cargoes. *Nat Rev Mol Cell Biol.* 2018;19(6):382-  
614 98.
- 615 50. Watson P, Forster R, Palmer KJ, Pepperkok R, Stephens DJ. Coupling of ER exit  
616 to microtubules through direct interaction of COPII with dynactin. *Nature cell*  
617 *biology.* 2005;7(1):48-55.
- 618 51. Tran Q, Park J, Lee H, Hong Y, Hong S, Park S, et al. TMEM39A and Human  
619 Diseases: A Brief Review. *Toxicol Res.* 2017;33(3):205-9.
- 620 52. Gordon DE, Jang GM, Bouhaddou M, Xu J, Obernier K, White KM, et al. A SARS-  
621 CoV-2 protein interaction map reveals targets for drug repurposing. *Nature.*  
622 2020;583(7816):459-68.
- 623 53. Baruah C, Devi P, Sharma DK. Sequence analysis and structure prediction of  
624 SARS-CoV-2 accessory proteins 9b and ORF14: evolutionary analysis indicates  
625 close relatedness to bat coronavirus. *ChemRxiv.*  
626 2020;<https://doi.org/10.26434/chemrxiv.12424958.v1>.
- 627 54. Mello CC, Kramer JM, Stinchcomb D, Ambros V. Efficient gene transfer in  
628 *C.elegans*: extrachromosomal maintenance and integration of transforming  
629 sequences. *EMBO J.* 1991;10(12):3959-70.
- 630 55. Zhao P, Zhang Z, Ke H, Yue Y, Xue D. Oligonucleotide-based targeted gene  
631 editing in *C. elegans* via the CRISPR/Cas9 system. *Cell Res.* 2014;24(2):247-50.
- 632

- 633 56. Zhao P, Zhang Z, Lv X, Zhao X, Suehiro Y, Jiang Y, et al. One-step homozygosity  
634 in precise gene editing by an improved CRISPR/Cas9 system. *Cell Res.*  
635 2016;26(5):633-6.
- 636 57. Brenner S. The genetics of *Caenorhabditis elegans*. *Genetics*. 1974;77(1):71-94.
- 637 58. Kamath RS, Ahringer J. Genome-wide RNAi screening in *Caenorhabditis elegans*.  
638 *Methods*. 2003;30(4):313-21.
- 639

640

641 **Figures**

642 **Figures 1 to 7.**

643 **Fig 1.**

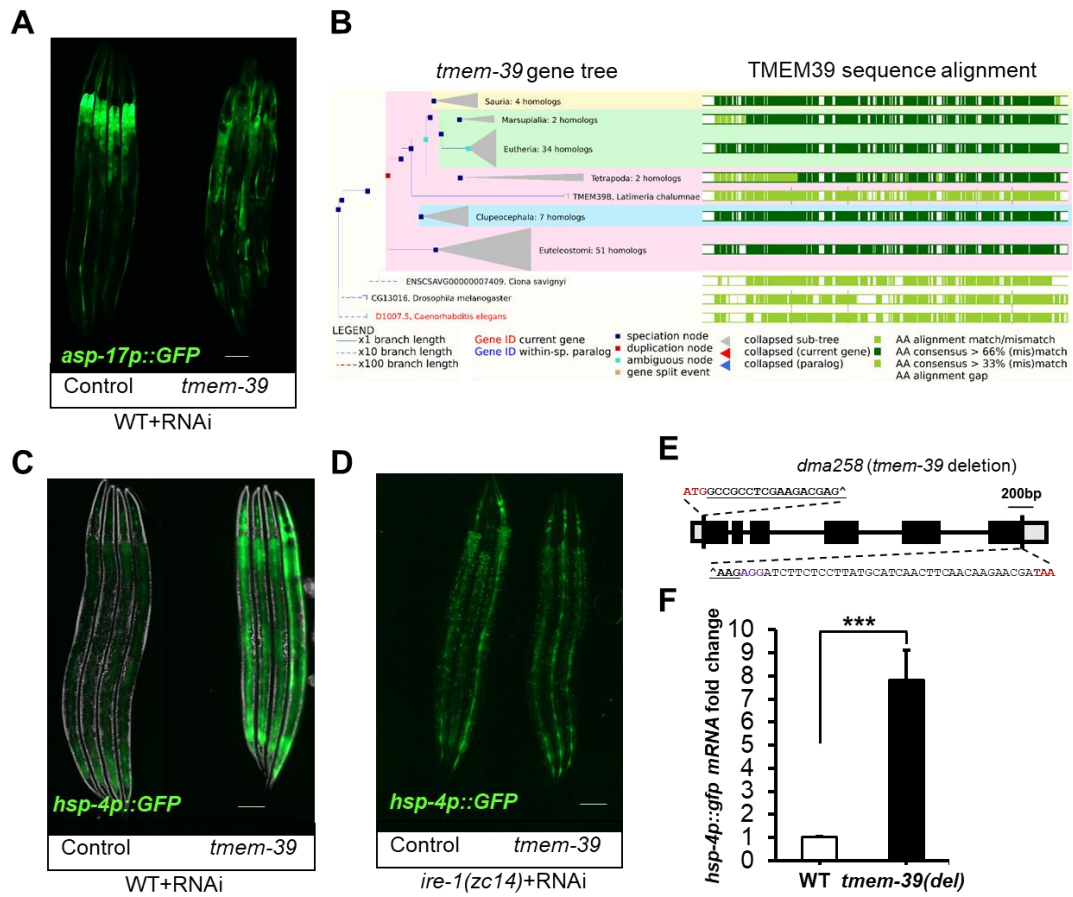



644 **Fig 2.**

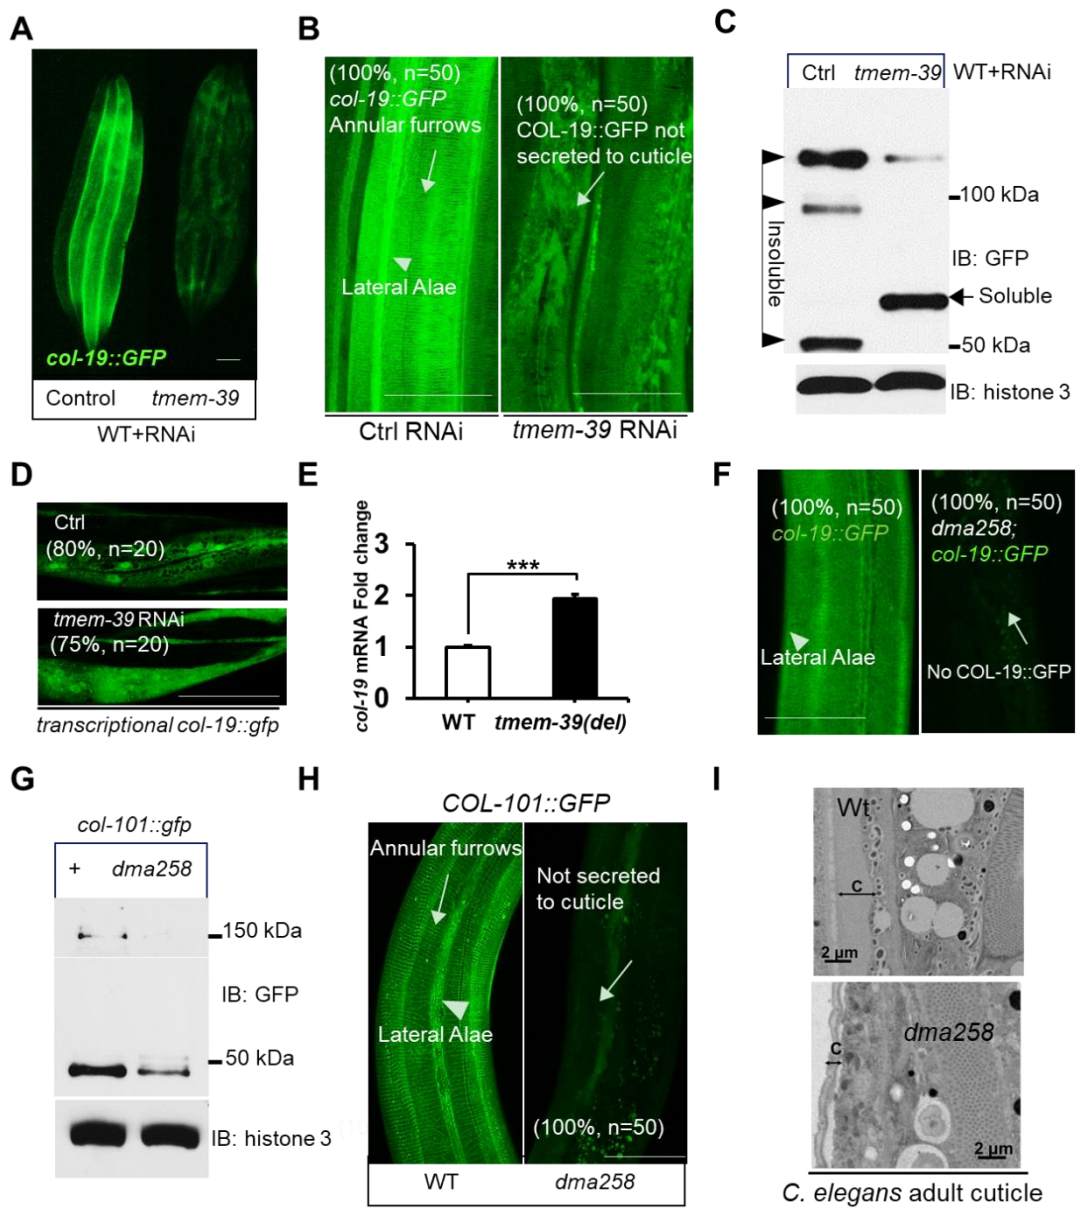

645

646

647 **Fig 3.**

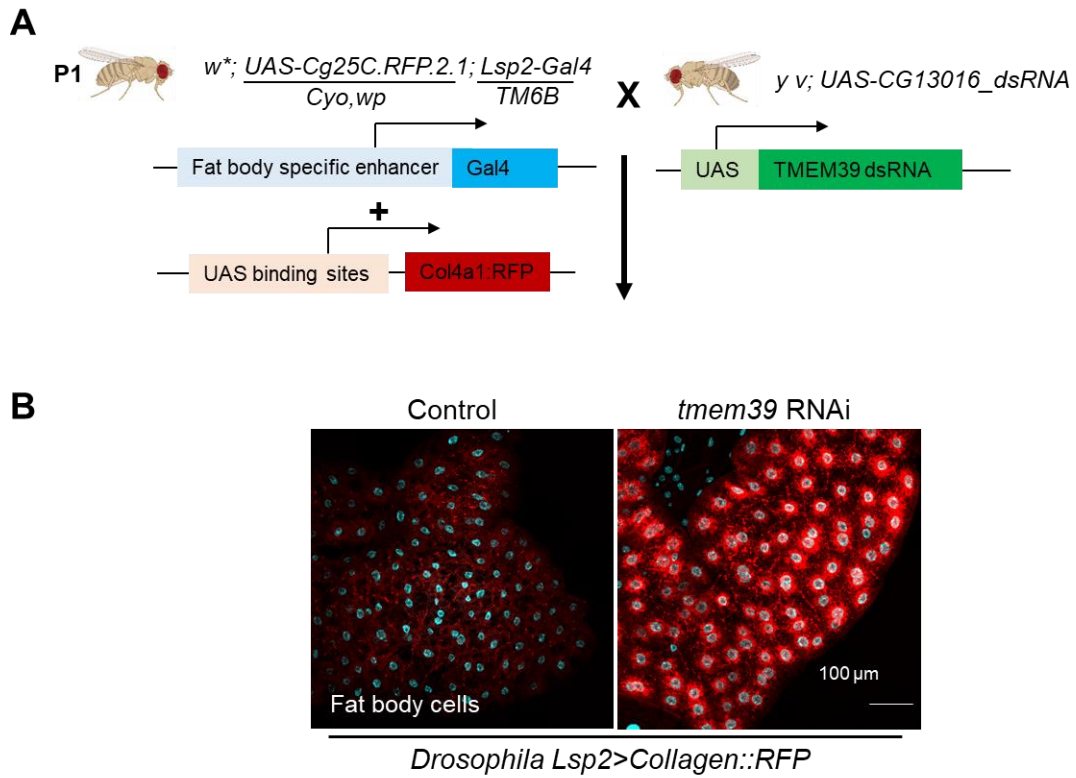



648 Fig 4.

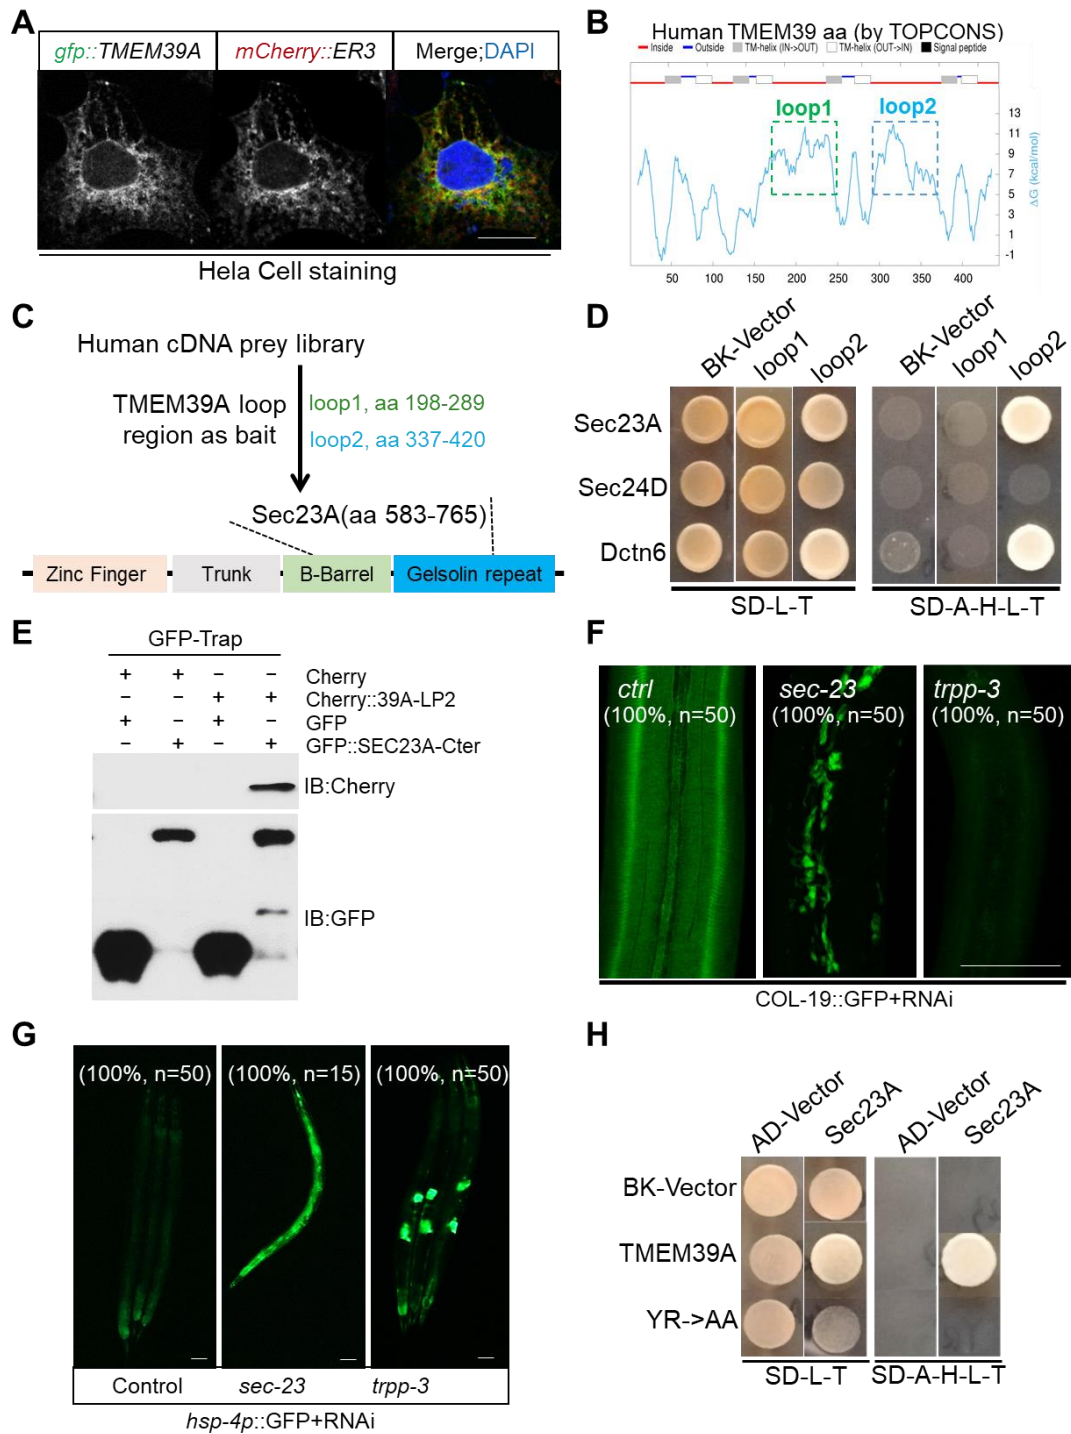

649 **Fig 5.**

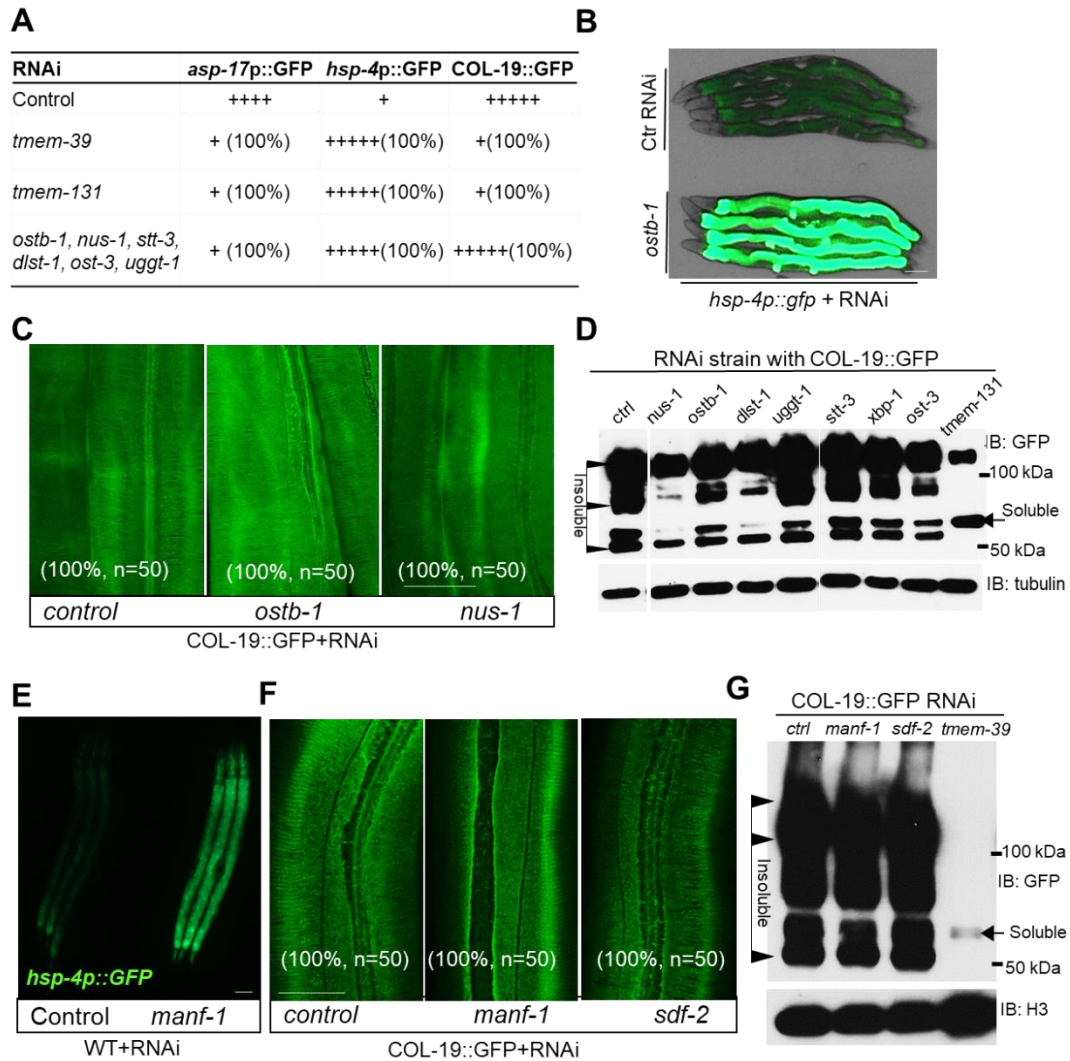

650

651 **Fig 6.**

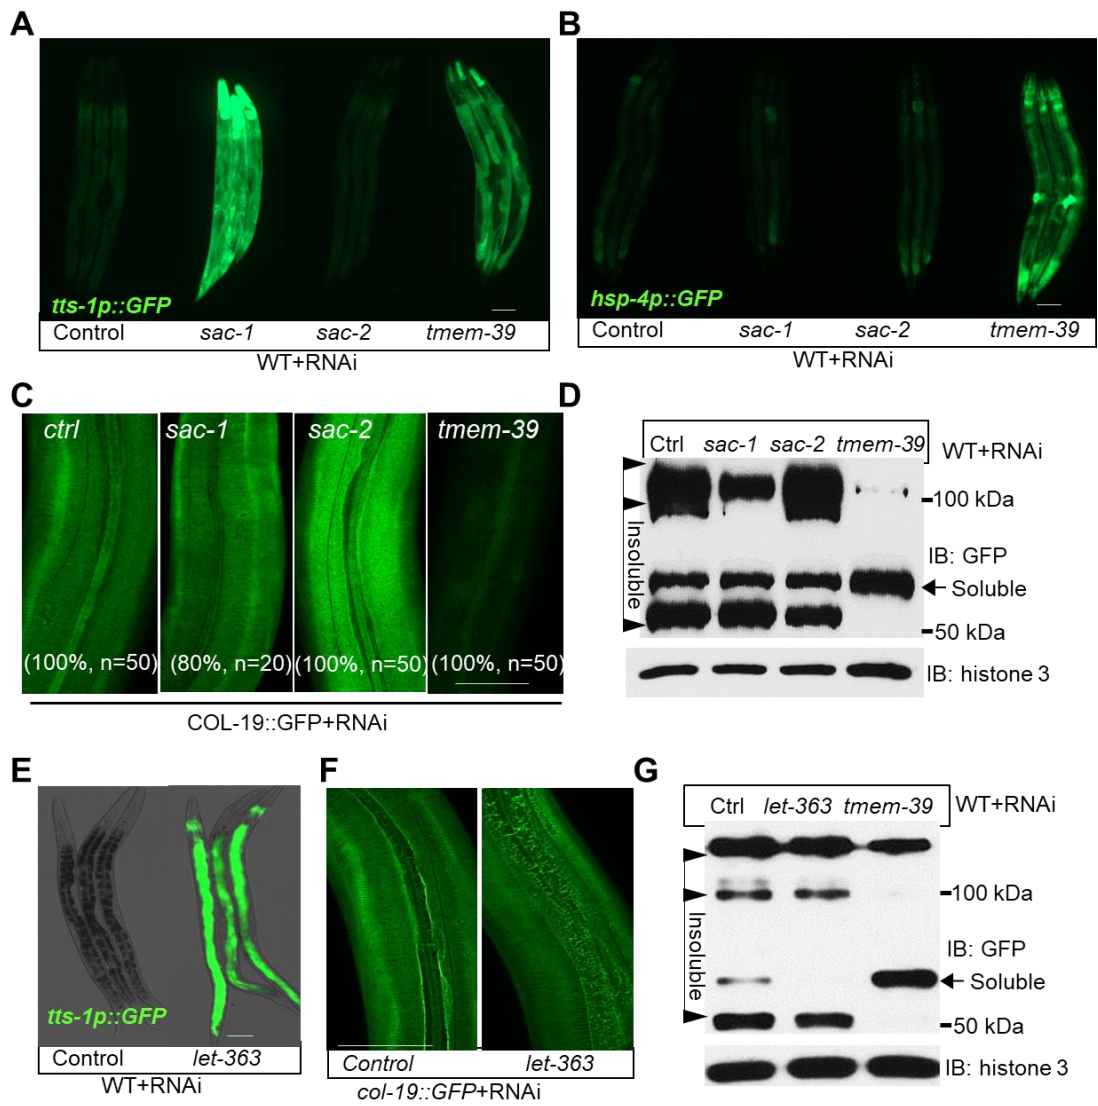

652 **Fig 7.**  
653  
654

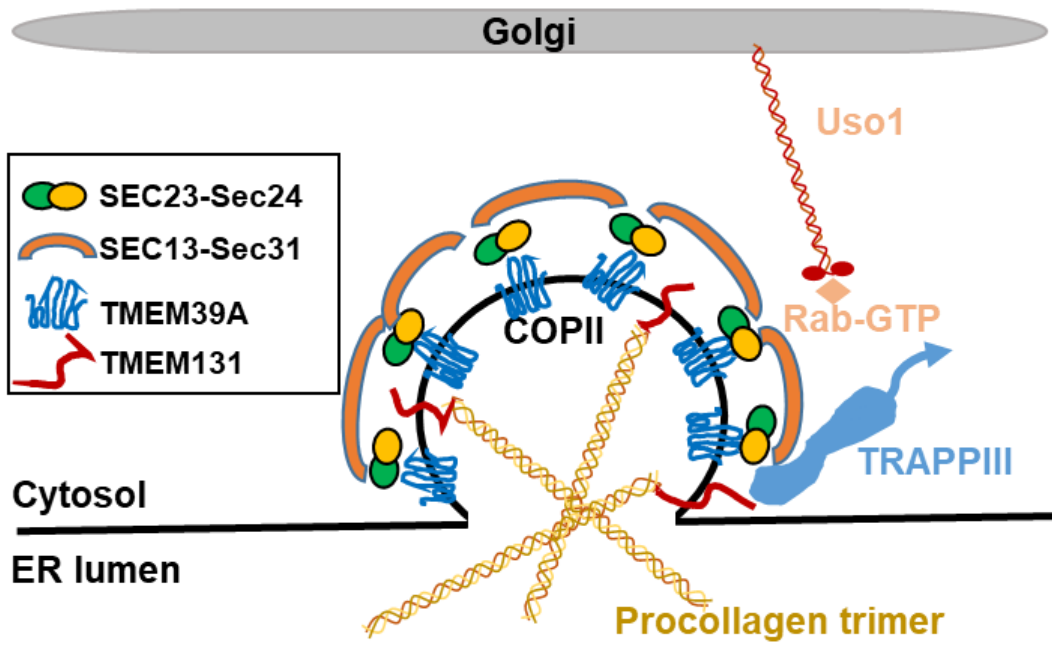

655

656 **Supporting Information**

657 **S1 to S4 Figures.**

658 **S1 to S4 Tables.**

659 **S1 Fig.**

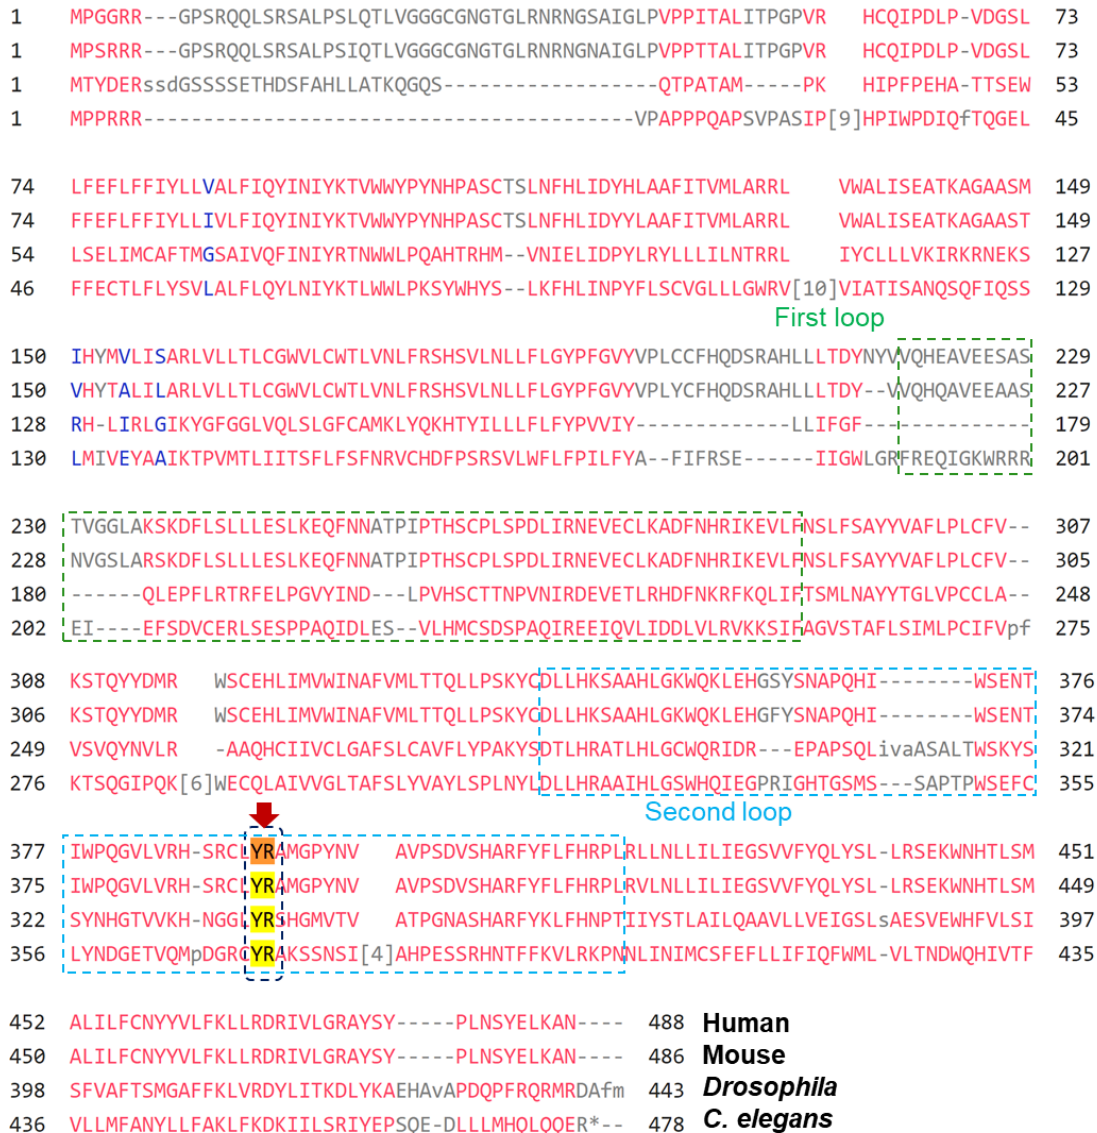

660

661

662 **S1 Fig. Evolutionarily conservation of TMEM39A protein sequences among**  
 663 **different species.**

664 Multiple sequence alignment of TMEM39A from major representative animal species  
 665 (by COBALT program), with conserved YR residues indicated in the second  
 666 cytoplasmic loop domains.

667



668 S2 Fig.

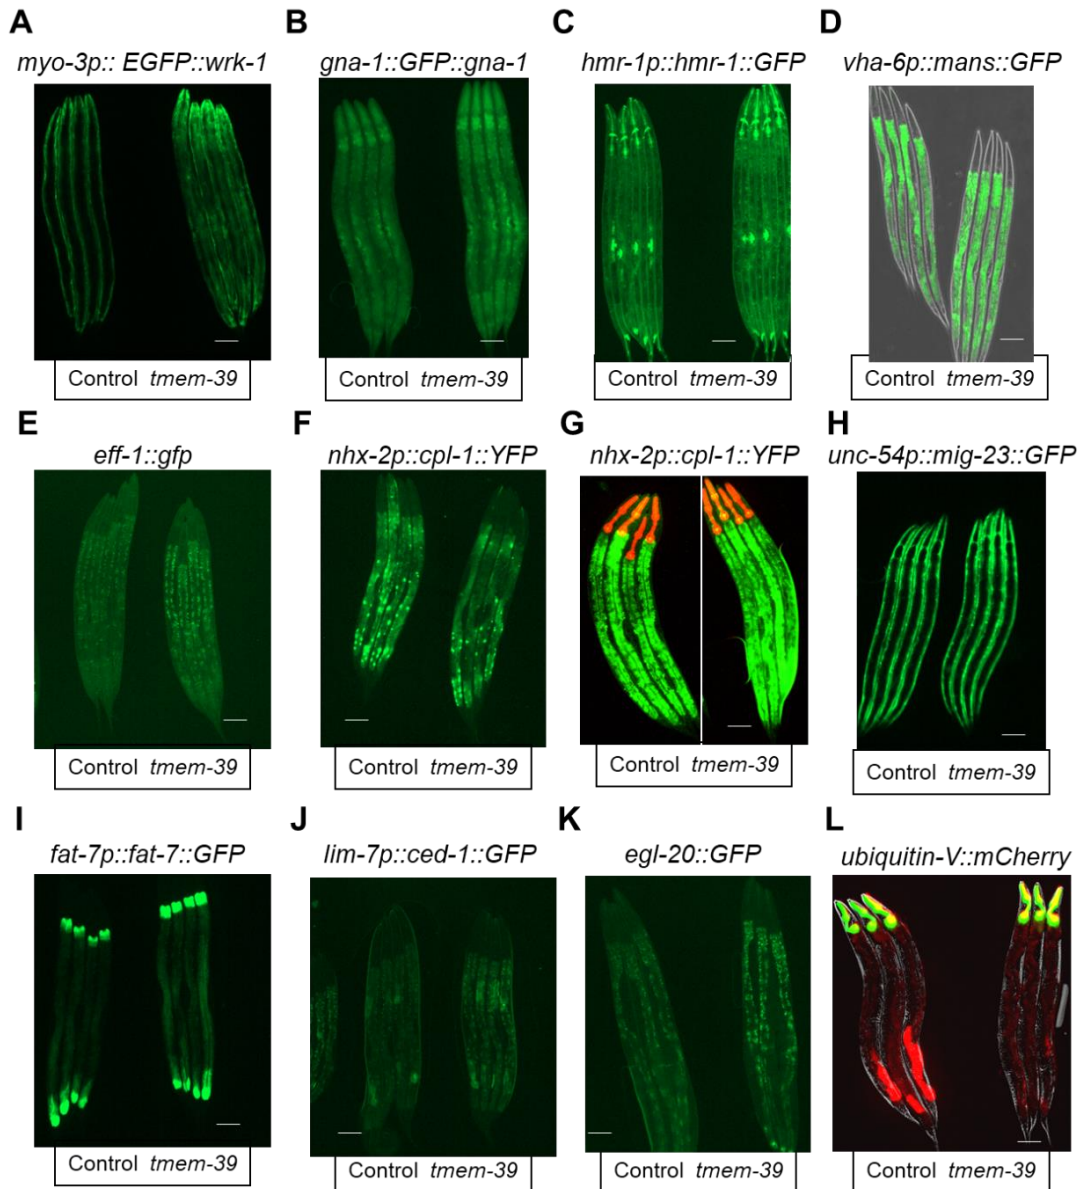

669 Refer to Extended Data S2 Fig. (continued)

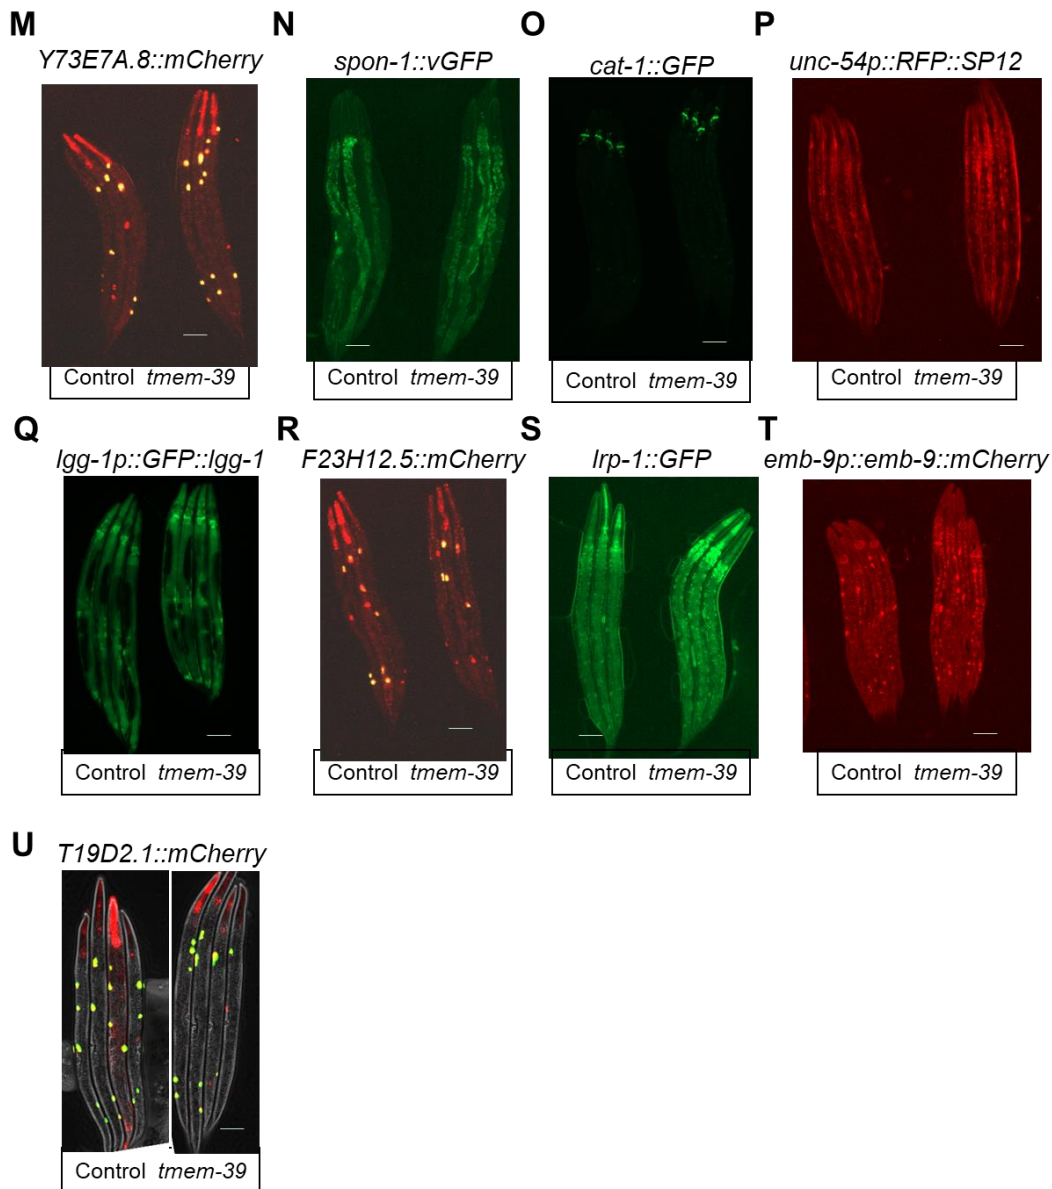

670

671

672 **S2 Fig. *mem-39* RNAi knock-down for screen of phenotypic defects of different**  
673 **translational fluorescent reporters.**

674 (A-V) Exemplar fluorescence images showing translational reporters for (A) *wrk-1*, (B)  
675 *gna-1*, (C) *hmr-1*, (D) *mans*, (E) *eff-1*, (F-G) *cpl-1*, (H) *mig-23*, (I) *fat-7*, (J) *ced-1*, (K)  
676 *egl-20*, (L) *ubiquitin-V*, (M) Y73E7A.8, (N) *spon-1*, (O) *cat-1*, (P) SP12, (Q) *lgg-1*, (R)  
677 F23H12.5, (S) *lrp-1*, (T) *emb-9* and (U) T19D2.1 in wild-type animals by control and  
678 *mem-39* RNAi at 20 °C (n = 3-4 for each reporters). Scale bars: 20  $\mu$ m.

679

680 **S3 Fig.**

681

682

683

684

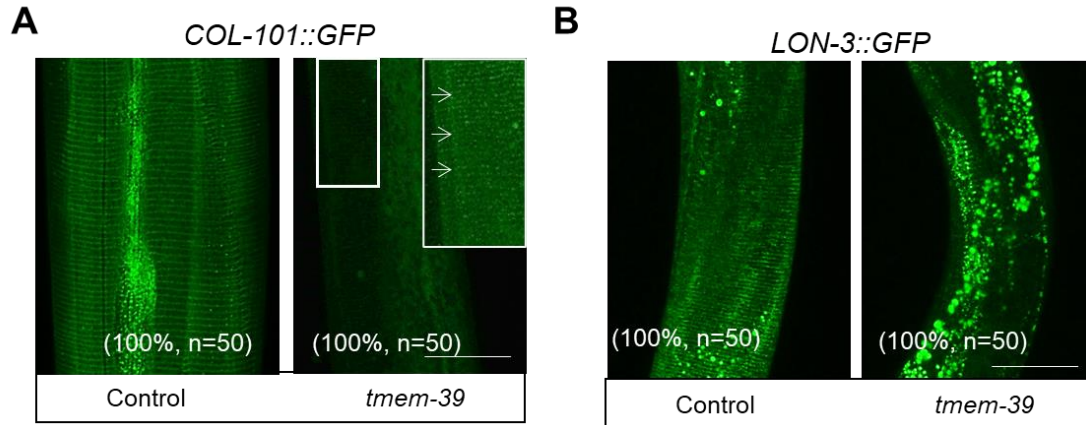

685

686

687 **S3 Fig. *tmem-39* RNAi knock-down in cuticle collagen translational fluorescent**  
688 **reporters.**

689 (A-B) Exemplar fluorescence images showing translational reporters for (A) *col-101*  
690 *and* (B) *lon-3*. In wild-type animals at 20 °C (n = 3-4 for each reporters). Scale bars: 20  
691  $\mu$ m.



692 **S4 Fig.**

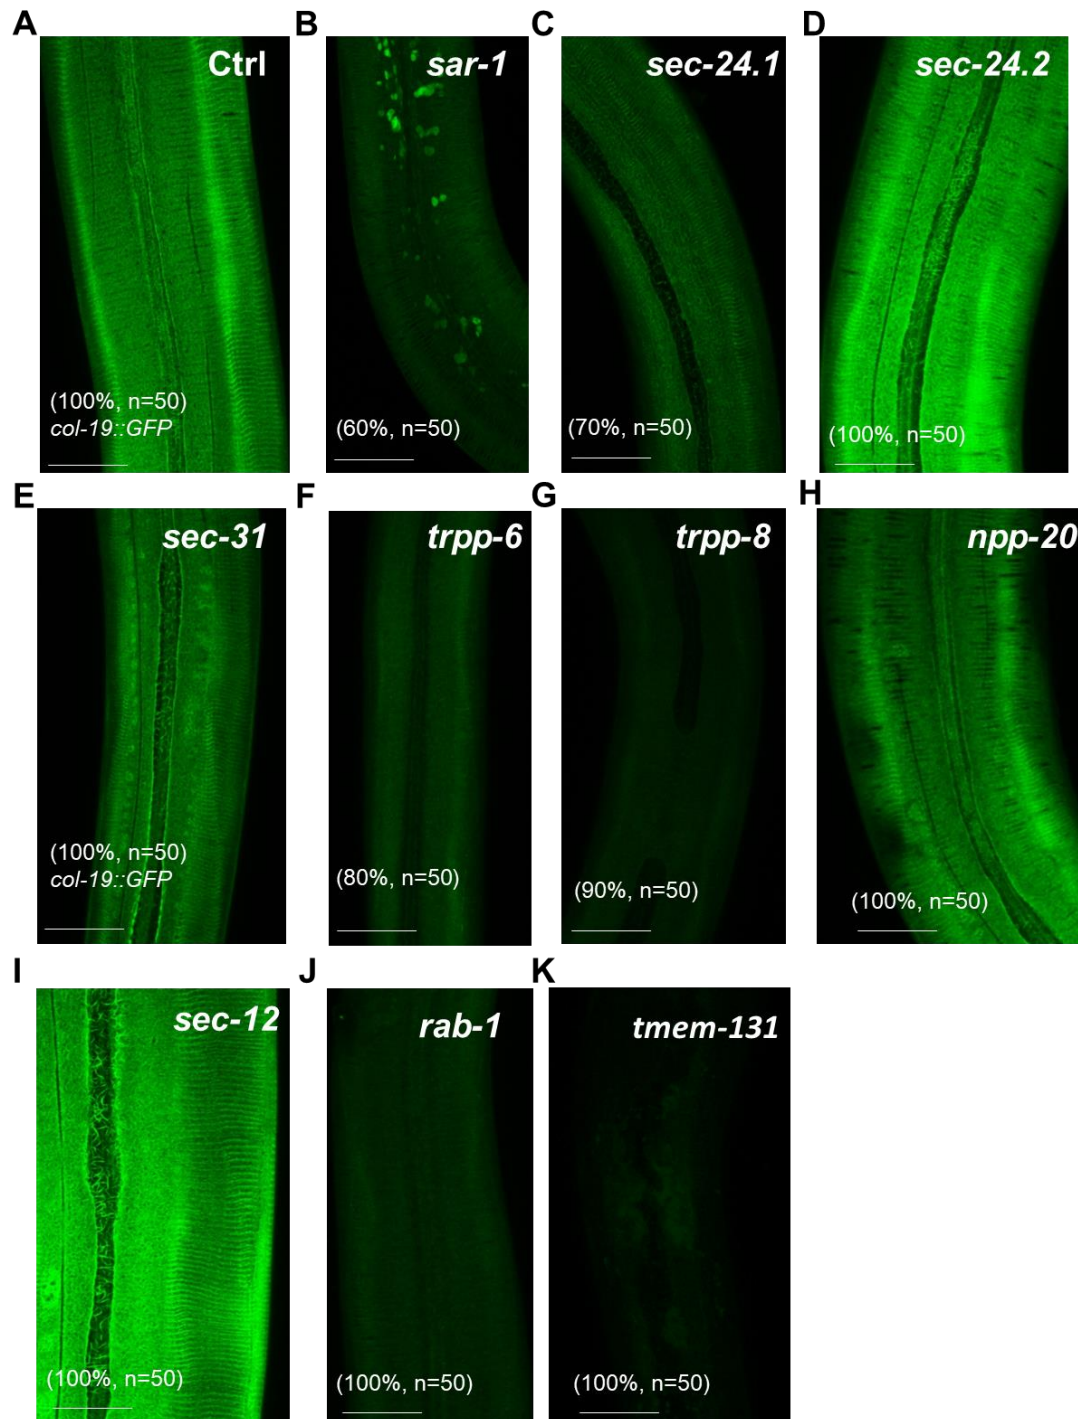

693

694

695 **S4 Fig. RNAi knock-down COP II component genes screen for collagen**  
696 **production defection.**

697 (A-J) Exemplar fluorescence images of *col-19* translational reporter for (A) control, (B)  
698 *sar-1*, (C) *sec-24.1*, (D) *sec-24.2*, (E) *sec-31*, (F) *trpp-6*, (G) *trpp-8*, (H) *npp-20*, (I) *sec-*  
699 *12*, (J) *rab-1* and (K) *tmem-131* RNAi in wild-type animals at 20 °C. Scale bars: 20 μm.

700 S5 Fig.

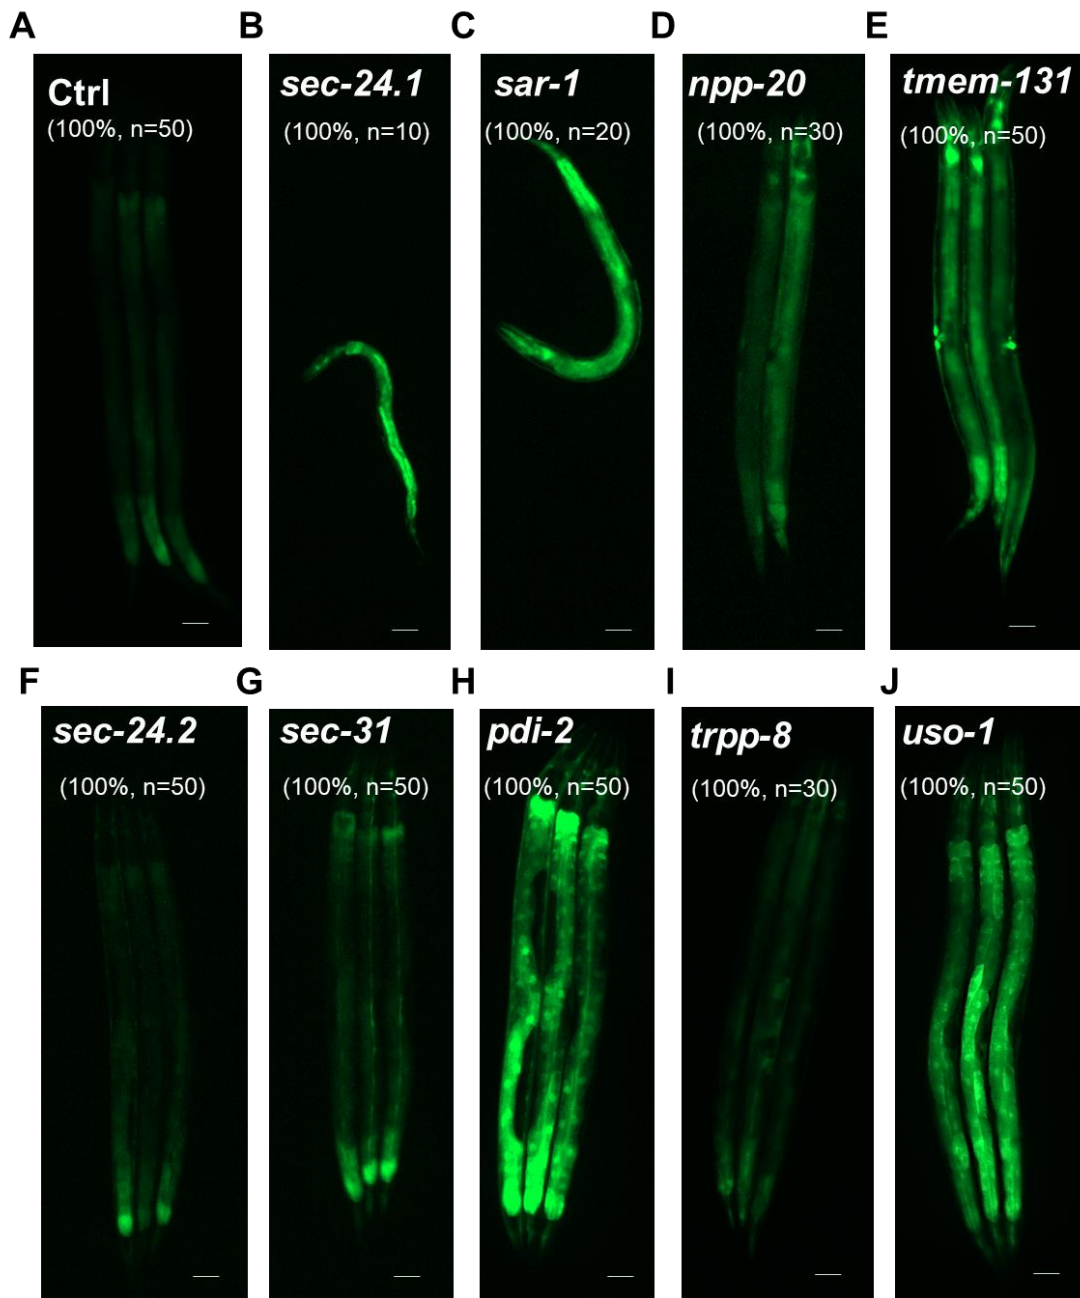

701

702

703

704 S5 Fig. RNAi knock-down COPII component genes for screen genes involved in  
705 ER stress response.

706 (A-J) Exemplar fluorescence images of *hsp-4p*::GFP transcriptional reporter for (A)  
707 control, (B) *sec-24.1*, (C) *sar-1*, (D) *npp-20*, (E) *tmem-131*, (F) *sec-24.2*, (G) *sec-31*,  
708 (H) *pdi-2*, (I) *trpp-8* and (J) *uso-1*RNAi in wild-type animals at 20 °C. Scale bars: 20  
709  $\mu$ m.

710

711 **S6 Fig.**

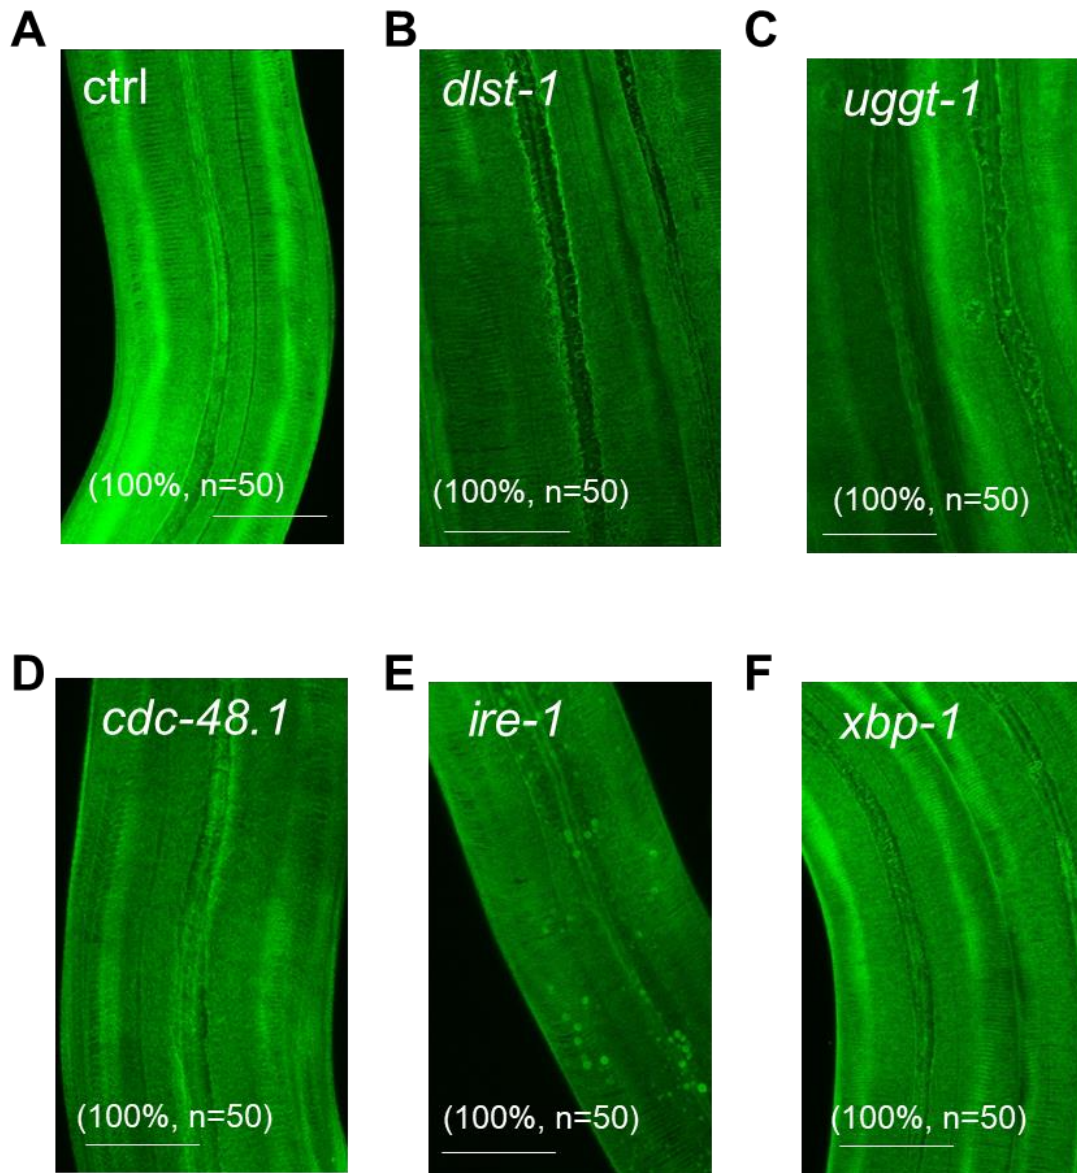

712

713

714 **S6 Fig. RNAi knock-down ER stress response genes in screen for collagen**  
715 **production defection.**

716 (A-F) Exemplar fluorescence images of *col-19* translational reporter for (A) control, (B)

717 *dlst-1*, (C) *uggt-1*, (D) *cdc-48.1*, (E) *ire-1* and (F) *xbp-1* in wild-type animals at 20 °C.

718 Scale bars: 20  $\mu$ m.

719

720 **S7 Fig.**

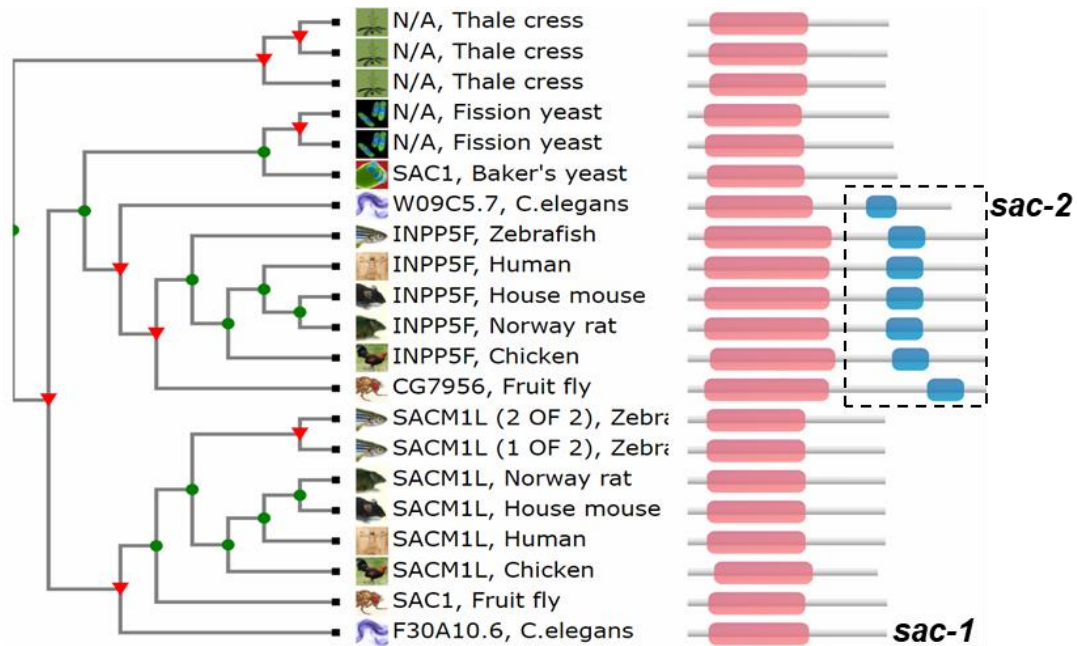

721

722 **S7 Fig. Cladogram showing conservation of the SAC1 protein sequences**  
723 **throughout evolution.**

724 Cladogram of phylogenetic tree for the SAC1 protein family from major  
725 representative Eukaryotic species (adapted from [www.treefam.org](http://www.treefam.org)). Domain  
726 architectures of SAC1 family proteins (right).

727



728

729

730

**S1 Table. Primers and oligos used in genomic editing.**

|         | Primer          | Sequence (5'-3')                                     |
|---------|-----------------|------------------------------------------------------|
|         | sgRNA-EcoRI-F   | ttgtaaaacgacggccagtgaattcCTCCAAGAACTCGTACAAA<br>AATG |
|         | sgRNA-HindIII-R | ctatgaccatgattacgccaagcttCACAGCCGACTATGTTTG          |
|         | TMEM-39         | <b><u>GCCGCCTCGAAGACGAGTG</u></b> GTTTAAGAGCTATGC    |
| sgRNA   | sgRNA1 F:       | TGAAACAGC                                            |
| cloning | TMEM-39         | <b><u>GCACTCGTCTTCGAGGCGGC</u></b> AAACATTTAGATTTGC  |
|         | sgRNA1 R:       | AATCAATTA                                            |
|         | TMEM-39         | <b><u>GATCTACGAACCTTCTCAAG</u></b> GTTTAAGAGCTATGCT  |
|         | sgRNA2 F:       | GGAAACAGC                                            |
|         | TMEM-39         | <b><u>CTTGAGAAGGTTCTAGATC</u></b> AAACATTTAGATTTGCA  |
|         | sgRNA2 R:       | ATTCAATTA                                            |
| Donor   | TMEM-39         | aagatATGCCGCCTCGAAGACGAG <sup>^</sup> AAGAGGATCTTC   |
| oligos  | deletion oligo: | TCCTTATGCATCAACTTCAACAAGAACGATAA                     |

731 Primers were used for PCR with the Addgene plasmid #46169 as template. Bold and

732 underlined are sgRNA target sequence from the *mem-39* regions. The location of the

733 deleted *mem-39* is marked with “^”, generating a precise 2750 bp deletion.

734

**S2 Table. Primers in Genotyping and RT-PCR.**

|                      | Primer                 | Sequence (5'-3')     |
|----------------------|------------------------|----------------------|
| Geno-<br>typing      | TMEM-39 Del screen F:  | tacagaaccgagaaggtcac |
|                      | TMEM-39 Del screen R:  | tcacaattgggtagtaccac |
|                      | TMEM-39 Del screen R2: | GTGTGAACTGAATATCCGGC |
|                      | COL-19::GFP screen F:  | TTCCAGGACAAAAGGGAGAG |
|                      | COL-19::GFP screen R:  | TCTCGAGAAGCATTGAACAC |
| RT-PCR               | <i>act-1</i> RT-F:     | CATCCCAGTTGGTGACGATA |
|                      | <i>act-1</i> RT-R:     | TCGGTATGGGACAGAAGGAC |
|                      | <i>gfp</i> RT-F:       | TGTTCCATGGCCAACACTTG |
|                      | <i>gfp</i> RT-R:       | ACGTGTCTTGTAGTTCCCGT |
|                      | <i>gfp</i> RT-R:       | ACGTGTCTTGTAGTTCCCGT |
|                      | <i>col-19</i> RT-F:    | TACTTGTGTGCGTTCTTGCC |
|                      | <i>col-19</i> RT-R:    | TTGGGTTGATGTGCTTGCTC |
|                      | <i>tmem-39</i> RT-F:   | GCTTCAATCCCAAGAGCGAG |
| <i>tmem-39</i> RT-R: | GACTTCGGAAGCCACCAAAG   |                      |

735

736

**S3 Table. Reporters examined in phenotypic screen for *tmem-39* RNAi**

| Genotype                             | Reporter                              | Control | <i>tmem-39</i> |
|--------------------------------------|---------------------------------------|---------|----------------|
| <i>hsp-4p::GFP</i>                   | <i>hsp-4</i> transcriptional          | *       | ****           |
| <i>col-19p::col-19::GFP</i>          | <i>col-19</i> translational           | ****    | *              |
| <i>cat-1p::cat-1::GFP</i>            | <i>cat-1</i> translational            | **      | **             |
| <i>eff-1p::eff-1::GFP</i>            | <i>eff-1</i> translational            | *       | **             |
| <i>emb-9p::emb-9::mCherry</i>        | <i>emb-9</i> translational            | ***     | ***            |
| <i>lrp-1p::lrp-1::GFP</i>            | <i>lrp-1</i> translational            | **      | **             |
| <i>fat-7p::fat-7::GFP</i>            | <i>fat-7</i> translational            | ***     | ***            |
| <i>gna-1p::GFP::gna-1</i>            | <i>gna-1</i> translational            | **      | **             |
| <i>him-4p::GFP::him-4</i>            | <i>him-4</i> translational            | **      | ***            |
| <i>hmr-1p::hmr-1::GFP</i>            | <i>hmr-1</i> translational            | ***     | ***            |
| <i>lgg-1p::mCherry::GFP::lgg-1</i>   | <i>lgg-1</i> translational            | **      | **             |
| <i>lim-7p::ced-1::GFP</i>            | <i>ced-1</i> translational            | **      | **             |
| <i>myo-3p::EGFP::wrk-1</i>           | <i>wrk-1</i> translational            | ***     | ****           |
| <i>nhx-2p::cpl-1::YFP</i>            | <i>cpl-1</i> translational            | **      | ***            |
| <i>nhx-2p::cpl-1(W32A Y35A)::YFP</i> | <i>cpl-1(W32A Y35A)</i> translational | ***     | ***            |
| <i>nhx-2p::ubiquitin-V::mCherry</i>  | ubiquitin-V proteins                  | ***     | ***            |
| <i>rpl-28p::F23H12.5::mCherry</i>    | F23H12.5 translational                | ****    | ****           |
| <i>rpl-28p::T19D2.1::mCherry</i>     | T19D2.1 translational                 | ****    | ****           |
| <i>rpl-28p::Y73E7A.8::mCherry</i>    | Y73E7A.8 translational                | ****    | ****           |
| <i>spon-1p::spon-1::vGFP</i>         | <i>spon-1</i> translational           | **      | **             |
| <i>unc-22p::egl-20::GFP</i>          | <i>egl-20</i> translational           | *       | ***            |
| <i>unc-54p::RFP::SP12</i>            | ER membrane RFP marker                | **      | ***            |
| <i>unc-54p::mig-23::GFP</i>          | <i>mig-23</i> translational           | ***     | ***            |
| <i>vha-6p::mans::GFP</i>             | intestinal GFP marker for the Golgi   | ***     | ***            |

737 \* indicates fluorescent reporter levels under control and *tmem-39* RNAi conditions;  
 738 qualitative changes were followed up by quantitative fluorescence ( $n \geq 20$  biological  
 739 replicates) and Western blot for verification.

740

741 **S4 Table. RNAi phenotypic analysis of genes for collagen secretion.**

| Type                               | RNAi             | gene            | Function                                  |
|------------------------------------|------------------|-----------------|-------------------------------------------|
| asp-17p::gfp<br>suppression        | <i>T09A5.11</i>  | <i>ostb-1</i>   | oligosaccharyl-transferase                |
|                                    | <i>F37B12.3</i>  | <i>nus-1</i>    | dehydrodolichyl diphosphate synthase      |
|                                    | <i>T12A2.2</i>   | <i>stt-3</i>    | oligosaccharyl-transferase                |
|                                    | <i>W02F12.5</i>  | <i>dlst-1</i>   | dihydrolipoamide S-succinyl-transferase   |
|                                    | <i>ZK686.3</i>   | <i>ost-3</i>    | oligosaccharyl-transferase                |
|                                    | <i>F48E3.3</i>   | <i>uggt-1</i>   | glycoprotein glucosyltransferase          |
| ER stress<br>regulation<br>pathway | <i>Y54G2A.23</i> | <i>manf-1</i>   | sulfatide binding and cytoprotecting      |
|                                    | <i>R12E2.13</i>  | <i>sdf-2</i>    | mannosyl-transferase                      |
|                                    | <i>C06A1.1</i>   | <i>cdc-48.1</i> | ER-associated misfolded protein catabolic |
|                                    | <i>C41C4.4</i>   | <i>ire-1</i>    | ER unfolded protein response (UPR)        |
|                                    | <i>R74.3</i>     | <i>xbp-1</i>    | ER UPR and <i>asp-17p::GFP</i> induction  |
| autophagy<br>regulation            | <i>F30A10.6</i>  | <i>sac-1</i>    | phosphatidylinositide phosphatase         |
|                                    | <i>W09C5.7</i>   | <i>sac-2</i>    | inositol polyphosphate-5-phosphatase      |
|                                    | <i>B0261.2</i>   | <i>let-363</i>  | mechanistic target of rapamycin kinase    |
